# Supplementary material for: Comparisons of Videolaryngoscopes for Intubation Undergoing General Anesthesia: Systematic Review and Network Meta-Analysis of Randomized Controlled Trials
Source: MDPI journal article supplement (doi:10.3390/jpm12030363), 2022-02-26
Supplement: s1 [file s1]

**Supplementary Digital File S1:** Comprehensive list presenting the search strategy

(Searching time – Jan. 30, 2020)

**Ovid-Medline**

1. exp laryngoscopes/
2. exp laryngoscopy/
3. (video?laryngoscop\* or ((video or indirect) adj3 laryngoscop\*) or Airtaq or Bullard or Pentax or Glidescope or McGrath or Storz or Venner or King Vision or Vividtrac or CoPilot VL or UE scope).mp.
4. or/1-3
5. ((randomized controlled trial or controlled clinical trial).pt. or randomized.ab. or placebo.ab. or drug therapy.fs. or randomly.ab. or trial.ab. or group.ab.) not (animals not (humans and animals)).sh.
6. 4 and 5

## **Ovid-Embase**

1. exp laryngoscope/
2. exp laryngoscopy/
3. (video?laryngoscop\* or ((video or indirect) adj3 laryngoscop\*) or Airtaq or Bullard or Pentax or Glidescope or McGrath or Storz or Venner or King Vision or Vividtrac or CoPilot VL or UE scope).mp.
4. or/1-3
5. ((randomized controlled trial or controlled clinical trial).pt. or randomized.ab. or placebo.ab. or drug therapy.fs. or randomly.ab. or trial.ab. or group.ab.) not (animals not (humans and animals)).sh.
6. 4 and 5

## **Cochrane Central Register of Controlled Trials**

1. MeSH descriptor: [Laryngoscope] explode all trees
2. MeSH descriptor: [Laryngoscopy] explode all trees
3. "Airtaq":ti,ab,kw.
4. "Bullard":ti,ab,kw.
5. "Pentax":ti,ab,kw.
6. "Glidescope":ti,ab,kw.
7. "McGrath":ti,ab,kw.
8. "Storz":ti,ab,kw.
9. "Venner":ti,ab,kw.
10. "King Vision":ti,ab,kw.
11. "Vividtrac":ti,ab,kw.
12. "CoPilot VL":ti,ab,kw.
13. "UE scope":ti,ab,kw.
14. #1 or #2 or #3 or #4 or #5 or #6 or #7 or #8 or #9 or #10 or #11 or #12 or #13
