# Supplementary material for: Comparisons of Videolaryngoscopes for Intubation Undergoing General Anesthesia: Systematic Review and Network Meta-Analysis of Randomized Controlled Trials
Source: MDPI journal article supplement (doi:10.3390/jpm12030363), 2022-02-26
Supplement: s1 [file s1]

| Participants (studies)<br>Follow up      | Risk of bias | Inconsistency | Indirectness | Imprecision | Publication bias | Overall certainty of evidence | Study event rates (%) |                 | Relative effect (95% CI) | Anticipated absolute effects |                                                |
|------------------------------------------|--------------|---------------|--------------|-------------|------------------|-------------------------------|-----------------------|-----------------|--------------------------|------------------------------|------------------------------------------------|
|                                          |              |               |              |             |                  |                               | Control               | Experimental    |                          | Risk with Control            | Risk difference with Experimental              |
| ATQ compared to CMD for Normal airway    |              |               |              |             |                  |                               |                       |                 |                          |                              |                                                |
| Success                                  | N/A          |               |              |             |                  |                               |                       |                 |                          |                              |                                                |
| Intubation time                          | N/A          |               |              |             |                  |                               |                       |                 |                          |                              |                                                |
| Glottic view                             | N/A          |               |              |             |                  |                               |                       |                 |                          |                              |                                                |
| Safety                                   | N/A          |               |              |             |                  |                               |                       |                 |                          |                              |                                                |
| ATQ compared to CMD for Difficult airway |              |               |              |             |                  |                               |                       |                 |                          |                              |                                                |
| Success                                  |              |               |              |             |                  |                               |                       |                 |                          |                              |                                                |
| 240 (1 RCT)                              | serious      | not serious   | not serious  | serious     | none             | ⊕⊕○○<br>LOW                   | 114/120 (95.0%)       | 102/120 (85.0%) | OR 0.51 (0.13 to 2.01)   | 950 per 1,000                | 44 fewer per 1,000 (from 238 fewer to 24 more) |
| Intubation time                          |              |               |              |             |                  |                               |                       |                 |                          |                              |                                                |
| 240 (1 RCT)                              | serious      | not serious   | not serious  | not serious | none             | ⊕⊕⊕○<br>MODERATE              | 120                   | 120             | -                        | -                            | SMD 0.58 SD lower (0.83 lower to 0.32 lower)   |
| Glottic view                             | N/A          |               |              |             |                  |                               |                       |                 |                          |                              |                                                |
| Safety                                   | N/A          |               |              |             |                  |                               |                       |                 |                          |                              |                                                |
| ATQ compared to CM for Normal airway     |              |               |              |             |                  |                               |                       |                 |                          |                              |                                                |
| Success                                  |              |               |              |             |                  |                               |                       |                 |                          |                              |                                                |

|                                         |         |             |             |         |      |             |                  |               |                            |               |                                                   |
|-----------------------------------------|---------|-------------|-------------|---------|------|-------------|------------------|---------------|----------------------------|---------------|---------------------------------------------------|
| 60<br>(1 RCT)                           | serious | not serious | not serious | serious | none | ⊕⊕○○<br>LOW | 28/30<br>(93.3%) | 27/30 (90.0%) | OR 0.64<br>(0.08 to 5.17)  | 933 per 1,000 | 34 fewer per 1,000<br>(from 405 fewer to 53 more) |
| Intubation time                         | N/A     |             |             |         |      |             |                  |               |                            |               |                                                   |
| Glottic view                            |         |             |             |         |      |             |                  |               |                            |               |                                                   |
| 60<br>(1 RCT)                           | serious | not serious | not serious | serious | none | ⊕⊕○○<br>LOW | 28/30<br>(93.3%) | 28/30 (93.3%) | OR 1.00<br>(0.08 to 11.87) | 933 per 1,000 | 0 fewer per 1,000<br>(from 405 fewer to 61 more)  |
| Safety                                  | N/A     |             |             |         |      |             |                  |               |                            |               |                                                   |
| ATQ compared to CM for Difficult airway |         |             |             |         |      |             |                  |               |                            |               |                                                   |
| Success                                 |         |             |             |         |      |             |                  |               |                            |               |                                                   |
| 59<br>(1 RCT)                           | serious | not serious | not serious | serious | none | ⊕⊕○○<br>LOW | 26/30<br>(86.7%) | 28/29 (96.6%) | OR 0.83<br>(0.25 to 2.77)  | 867 per 1,000 | 23 fewer per 1,000<br>(from 248 fewer to 81 more) |
| Intubation time                         | N/A     |             |             |         |      |             |                  |               |                            |               |                                                   |
| Glottic view                            | N/A     |             |             |         |      |             |                  |               |                            |               |                                                   |
| Safety                                  | N/A     |             |             |         |      |             |                  |               |                            |               |                                                   |
| ATQ compared to KV for Normal airway    |         |             |             |         |      |             |                  |               |                            |               |                                                   |
| Success                                 |         |             |             |         |      |             |                  |               |                            |               |                                                   |

|                                         |         |             |             |             |      |                  |                    |                    |                                  |               |                                                           |
|-----------------------------------------|---------|-------------|-------------|-------------|------|------------------|--------------------|--------------------|----------------------------------|---------------|-----------------------------------------------------------|
| 110<br>(2 RCTs)                         | serious | not serious | not serious | serious     | none | ⊕⊕○○<br>LOW      | 47/54<br>(87.0%)   | 42/56 (75.0%)      | <b>OR 0.47</b><br>(0.16 to 1.41) | 870 per 1,000 | <b>111 fewer per 1,000</b><br>(from 352 fewer to 34 more) |
| Intubation time                         |         |             |             |             |      |                  |                    |                    |                                  |               |                                                           |
| 43<br>(1 RCT)                           | serious | not serious | not serious | not serious | none | ⊕⊕⊕○<br>MODERATE | 22                 | 21                 | -                                | -             | <b>SMD 1.14 SD higher</b><br>(0.49 higher to 1.79 higher) |
| Glottic view                            |         |             |             |             |      |                  |                    |                    |                                  |               |                                                           |
| 110<br>(2 RCTs)                         | serious | serious     | not serious | not serious | none | ⊕⊕○○<br>LOW      | 47/54<br>(87.0%)   | 49/56 (87.5%)      | <b>OR 1.12</b><br>(0.22 to 5.84) | 870 per 1,000 | <b>12 more per 1,000</b><br>(from 274 fewer to 105 more)  |
| Safety                                  |         |             |             |             |      |                  |                    |                    |                                  |               |                                                           |
| 110<br>(2 RCTs)                         | serious | not serious | not serious | serious     | none | ⊕⊕○○<br>LOW      | 41/54<br>(75.9%)   | 49/56 (87.5%)      | <b>OR 1.28</b><br>(0.37 to 4.42) | 759 per 1,000 | <b>42 more per 1,000</b><br>(from 221 fewer to 174 more)  |
| ATQ compared to KV for Difficult airway |         |             |             |             |      |                  |                    |                    |                                  |               |                                                           |
| Success                                 |         |             |             |             |      |                  |                    |                    |                                  |               |                                                           |
| 480<br>(2 RCTs)                         | serious | not serious | not serious | serious     | none | ⊕⊕○○<br>LOW      | 212/240<br>(88.3%) | 200/240<br>(83.3%) | <b>OR 0.93</b><br>(0.31 to 2.79) | 883 per 1,000 | <b>8 fewer per 1,000</b><br>(from 182 fewer to 71 more)   |
| Intubation time                         |         |             |             |             |      |                  |                    |                    |                                  |               |                                                           |

|                                       |         |             |             |             |      |                  |                    |                    |                                  |               |                                                           |
|---------------------------------------|---------|-------------|-------------|-------------|------|------------------|--------------------|--------------------|----------------------------------|---------------|-----------------------------------------------------------|
| 240<br>(1 RCT)                        | serious | not serious | not serious | not serious | none | ⊕⊕⊕○<br>MODERATE | 120                | 120                | -                                | -             | SMD <b>0.62 SD lower</b><br>(0.88 lower to 0.37 lower)    |
| Glottic view                          |         |             |             |             |      |                  |                    |                    |                                  |               |                                                           |
| 240<br>(1 RCT)                        | serious | not serious | not serious | serious     | none | ⊕⊕○○<br>LOW      | 116/120<br>(96.7%) | 107/120<br>(89.2%) | <b>OR 0.28</b><br>(0.02 to 4.10) | 967 per 1,000 | <b>76 fewer per 1,000</b><br>(from 600 fewer to 25 more)  |
| Safety                                |         |             |             |             |      |                  |                    |                    |                                  |               |                                                           |
| 240<br>(1 RCT)                        | serious | not serious | not serious | serious     | none | ⊕⊕○○<br>LOW      | 84/120<br>(70.0%)  | 99/120<br>(82.5%)  | <b>OR 1.33</b><br>(0.68 to 2.57) | 700 per 1,000 | <b>56 more per 1,000</b><br>(from 87 fewer to 157 more)   |
| ATQ compared to GVL for Normal airway |         |             |             |             |      |                  |                    |                    |                                  |               |                                                           |
| Success                               |         |             |             |             |      |                  |                    |                    |                                  |               |                                                           |
| 181<br>(3 RCTs)                       | serious | not serious | not serious | serious     | none | ⊕⊕○○<br>LOW      | 83/90<br>(92.2%)   | 75/91 (82.4%)      | <b>OR 0.56</b><br>(0.23 to 1.38) | 922 per 1,000 | <b>53 fewer per 1,000</b><br>(from 191 fewer to 20 more)  |
| Intubation time                       |         |             |             |             |      |                  |                    |                    |                                  |               |                                                           |
| 42<br>(1 RCT)                         | serious | not serious | not serious | not serious | none | ⊕⊕⊕○<br>MODERATE | 21                 | 21                 | -                                | -             | SMD <b>2.43 SD higher</b><br>(1.62 higher to 3.24 higher) |
| Glottic view                          |         |             |             |             |      |                  |                    |                    |                                  |               |                                                           |

|                                          |         |             |             |             |      |                  |                    |                    |                                    |               |                                                         |
|------------------------------------------|---------|-------------|-------------|-------------|------|------------------|--------------------|--------------------|------------------------------------|---------------|---------------------------------------------------------|
| 181<br>(3 RCTs)                          | serious | not serious | not serious | serious     | none | ⊕⊕○○<br>LOW      | 83/90<br>(92.2%)   | 77/91 (84.6%)      | <b>OR 1.02</b><br>(0.23 to 4.56)   | 922 per 1,000 | <b>1 more per 1,000</b><br>(from 191 fewer to 60 more)  |
| Safety                                   |         |             |             |             |      |                  |                    |                    |                                    |               |                                                         |
| 181<br>(3 RCTs)                          | serious | not serious | not serious | not serious | none | ⊕⊕⊕○<br>MODERATE | 61/90<br>(67.8%)   | 78/91 (85.7%)      | <b>OR 2.78</b><br>(1.13 to 6.81)   | 678 per 1,000 | <b>176 more per 1,000</b><br>(from 26 more to 257 more) |
| ATQ compared to GVL for Difficult airway |         |             |             |             |      |                  |                    |                    |                                    |               |                                                         |
| Success                                  |         |             |             |             |      |                  |                    |                    |                                    |               |                                                         |
| 312<br>(2 RCTs)                          | serious | not serious | not serious | serious     | none | ⊕⊕○○<br>LOW      | 131/156<br>(84.0%) | 130/156<br>(83.3%) | <b>OR 1.14</b><br>(0.45 to 2.91)   | 840 per 1,000 | <b>17 more per 1,000</b><br>(from 138 fewer to 99 more) |
| Intubation time                          |         |             |             |             |      |                  |                    |                    |                                    |               |                                                         |
| 240<br>(1 RCT)                           | serious | not serious | not serious | not serious | none | ⊕⊕⊕○<br>MODERATE | 120                | 120                | -                                  | -             | <b>SMD 0.71 SD lower</b><br>(0.97 lower to 0.45 lower)  |
| Glottic view                             |         |             |             |             |      |                  |                    |                    |                                    |               |                                                         |
| 72<br>(1 RCT)                            | serious | not serious | not serious | serious     | none | ⊕⊕○○<br>LOW      | 33/36<br>(91.7%)   | 36/36<br>(100.0%)  | <b>OR 7.63</b><br>(0.16 to 358.10) | 917 per 1,000 | <b>72 more per 1,000</b><br>(from 279 fewer to 83 more) |
| Safety                                   |         |             |             |             |      |                  |                    |                    |                                    |               |                                                         |

|                                         |         |             |             |             |      |                  |                   |                   |                                   |                 |                                                          |
|-----------------------------------------|---------|-------------|-------------|-------------|------|------------------|-------------------|-------------------|-----------------------------------|-----------------|----------------------------------------------------------|
| 72<br>(1 RCT)                           | serious | not serious | not serious | serious     | none | ⊕⊕○○<br>LOW      | 33/36<br>(91.7%)  | 34/36 (94.4%)     | <b>OR 1.43</b><br>(0.49 to 4.15)  | 917 per 1,000   | <b>24 more per 1,000</b><br>(from 73 fewer to 62 more)   |
| ATQ compared to MG for Normal airway    |         |             |             |             |      |                  |                   |                   |                                   |                 |                                                          |
| Success                                 |         |             |             |             |      |                  |                   |                   |                                   |                 |                                                          |
| 147<br>(2 RCTs)                         | serious | not serious | not serious | serious     | none | ⊕⊕○○<br>LOW      | 67/74<br>(90.5%)  | 67/73 (91.8%)     | <b>OR 0.79</b><br>(0.29 to 2.12)  | 905 per 1,000   | <b>22 fewer per 1,000</b><br>(from 170 fewer to 48 more) |
| Intubation time                         |         |             |             |             |      |                  |                   |                   |                                   |                 |                                                          |
| 87<br>(1 RCT)                           | serious | not serious | not serious | not serious | none | ⊕⊕⊕○<br>MODERATE | 44                | 43                | -                                 | -               | <b>SMD 0.97 SD lower</b><br>(1.42 lower to 0.52 lower)   |
| Glottic view                            |         |             |             |             |      |                  |                   |                   |                                   |                 |                                                          |
| 147<br>(2 RCTs)                         | serious | not serious | not serious | serious     | none | ⊕⊕○○<br>LOW      | 74/74<br>(100.0%) | 73/73<br>(100.0%) | <b>OR 0.99</b><br>(0.05 to 19.17) | 1,000 per 1,000 | <b>0 fewer per 1,000</b><br>(from 0 fewer to 0 fewer)    |
| Safety                                  |         |             |             |             |      |                  |                   |                   |                                   |                 |                                                          |
| 87<br>(1 RCT)                           | serious | not serious | not serious | serious     | none | ⊕⊕○○<br>LOW      | 39/44<br>(88.6%)  | 35/43 (81.4%)     | <b>OR 0.75</b><br>(0.16 to 3.43)  | 886 per 1,000   | <b>32 fewer per 1,000</b><br>(from 331 fewer to 78 more) |
| ATQ compared to MG for Difficult airway |         |             |             |             |      |                  |                   |                   |                                   |                 |                                                          |
| Success                                 |         |             |             |             |      |                  |                   |                   |                                   |                 |                                                          |

|                                       |         |             |             |             |      |                  |                    |                    |                                   |                  |                                                                    |
|---------------------------------------|---------|-------------|-------------|-------------|------|------------------|--------------------|--------------------|-----------------------------------|------------------|--------------------------------------------------------------------|
| 240<br>(1 RCT)                        | serious | not serious | not serious | serious     | none | ⊕⊕○○<br>LOW      | 117/120<br>(97.5%) | 102/120<br>(85.0%) | <b>OR 0.78</b><br>(0.16 to 3.43)  | 975 per<br>1,000 | <b>7 fewer per<br/>1,000</b><br>(from 113<br>fewer to 18<br>more)  |
| Intubation time                       |         |             |             |             |      |                  |                    |                    |                                   |                  |                                                                    |
| 240<br>(1 RCT)                        | serious | not serious | not serious | not serious | none | ⊕⊕⊕○<br>MODERATE | 120                | 120                | -                                 | -                | SMD <b>0.43 SD<br/>lower</b><br>(0.68 lower to<br>0.17 lower)      |
| Glottic view                          | N/A     |             |             |             |      |                  |                    |                    |                                   |                  |                                                                    |
| Safety                                | N/A     |             |             |             |      |                  |                    |                    |                                   |                  |                                                                    |
| ATQ compared to MCL for Normal airway |         |             |             |             |      |                  |                    |                    |                                   |                  |                                                                    |
| Success                               |         |             |             |             |      |                  |                    |                    |                                   |                  |                                                                    |
| 320<br>(5 RCTs)                       | serious | not serious | not serious | serious     | none | ⊕⊕○○<br>LOW      | 148/159<br>(93.1%) | 147/161<br>(91.3%) | <b>OR 0.87</b><br>(0.37 to 2.04)  | 931 per<br>1,000 | <b>10 fewer per<br/>1,000</b><br>(from 98<br>fewer to 34<br>more)  |
| Intubation time                       |         |             |             |             |      |                  |                    |                    |                                   |                  |                                                                    |
| 193<br>(3 RCTs)                       | serious | serious     | not serious | not serious | none | ⊕⊕○○<br>LOW      | 97                 | 96                 | -                                 | -                | SMD <b>0.02 SD<br/>higher</b><br>(2.58 lower to<br>2.62 higher)    |
| Glottic view                          |         |             |             |             |      |                  |                    |                    |                                   |                  |                                                                    |
| 320<br>(5 RCTs)                       | serious | not serious | not serious | serious     | none | ⊕⊕○○<br>LOW      | 138/159<br>(86.8%) | 154/161<br>(95.7%) | <b>OR 8.07</b><br>(0.70 to 93.52) | 868 per<br>1,000 | <b>114 more per<br/>1,000</b><br>(from 46<br>fewer to 130<br>more) |

|                                          |         |             |             |             |      |                  |                    |                    |                           |               |                                                     |
|------------------------------------------|---------|-------------|-------------|-------------|------|------------------|--------------------|--------------------|---------------------------|---------------|-----------------------------------------------------|
| Safety                                   |         |             |             |             |      |                  |                    |                    |                           |               |                                                     |
| 190<br>(3 RCTs)                          | serious | not serious | not serious | not serious | none | ⊕⊕⊕○<br>MODERATE | 37/94<br>(39.4%)   | 55/96 (57.3%)      | OR 3.13<br>(1.26 to 7.80) | 394 per 1,000 | 277 more per 1,000<br>(from 56 more to 441 more)    |
| ATQ compared to MCL for Difficult airway |         |             |             |             |      |                  |                    |                    |                           |               |                                                     |
| Success                                  |         |             |             |             |      |                  |                    |                    |                           |               |                                                     |
| 778<br>(9 RCTs)                          | serious | not serious | not serious | not serious | none | ⊕⊕⊕○<br>MODERATE | 285/388<br>(73.5%) | 360/390<br>(92.3%) | OR 3.06<br>(1.39 to 6.72) | 735 per 1,000 | 160 more per 1,000<br>(from 59 more to 214 more)    |
| Intubation time                          |         |             |             |             |      |                  |                    |                    |                           |               |                                                     |
| 172<br>(2 RCTs)                          | serious | serious     | not serious | not serious | none | ⊕⊕○○<br>LOW      | 84                 | 88                 | -                         | -             | SMD 1.17 SD lower<br>(1.75 lower to 0.58 lower)     |
| Glottic view                             |         |             |             |             |      |                  |                    |                    |                           |               |                                                     |
| 1020<br>(10 RCTs)                        | serious | not serious | not serious | serious     | none | ⊕⊕○○<br>LOW      | 324/508<br>(63.8%) | 490/512<br>(95.7%) | OR 0.24<br>(0.01 to 3.94) | 638 per 1,000 | 341 fewer per 1,000<br>(from 620 fewer to 236 more) |
| Safety                                   |         |             |             |             |      |                  |                    |                    |                           |               |                                                     |
| 545<br>(3 RCTs)                          | serious | not serious | not serious | serious     | none | ⊕⊕○○<br>LOW      | 183/266<br>(68.8%) | 234/279<br>(83.9%) | OR 1.48<br>(0.82 to 2.68) | 688 per 1,000 | 77 more per 1,000<br>(from 44 fewer to 167 more)    |
| AWS compared to CM for Normal airway     |         |             |             |             |      |                  |                    |                    |                           |               |                                                     |
| Success                                  | N/A     |             |             |             |      |                  |                    |                    |                           |               |                                                     |



|                                         |         |             |             |         |      |             |                  |                   |                                   |               |                                                         |
|-----------------------------------------|---------|-------------|-------------|---------|------|-------------|------------------|-------------------|-----------------------------------|---------------|---------------------------------------------------------|
| Intubation time                         | N/A     |             |             |         |      |             |                  |                   |                                   |               |                                                         |
| Glottic view                            | N/A     |             |             |         |      |             |                  |                   |                                   |               |                                                         |
| Safety                                  | N/A     |             |             |         |      |             |                  |                   |                                   |               |                                                         |
| AWS compared to CM for Difficult airway |         |             |             |         |      |             |                  |                   |                                   |               |                                                         |
| Success                                 | N/A     |             |             |         |      |             |                  |                   |                                   |               |                                                         |
| Intubation time                         | N/A     |             |             |         |      |             |                  |                   |                                   |               |                                                         |
| Glottic view                            | N/A     |             |             |         |      |             |                  |                   |                                   |               |                                                         |
| Safety                                  | N/A     |             |             |         |      |             |                  |                   |                                   |               |                                                         |
| AWS compared to MCL for Normal airway   |         |             |             |         |      |             |                  |                   |                                   |               |                                                         |
| Success                                 |         |             |             |         |      |             |                  |                   |                                   |               |                                                         |
| 68<br>(1 RCT)                           | serious | not serious | not serious | serious | none | ⊕⊕○○<br>LOW | 32/34<br>(94.1%) | 31/34 (91.2%)     | <b>OR 1.71</b><br>(0.19 to 15.72) | 941 per 1,000 | <b>24 more per 1,000</b><br>(from 189 fewer to 55 more) |
| Intubation time                         | N/A     |             |             |         |      |             |                  |                   |                                   |               |                                                         |
| Glottic view                            |         |             |             |         |      |             |                  |                   |                                   |               |                                                         |
| 92<br>(2 RCTs)                          | serious | not serious | not serious | serious | none | ⊕⊕○○<br>LOW | 43/46<br>(93.5%) | 46/46<br>(100.0%) | <b>OR 1.09</b><br>(0.25 to 4.86)  | 935 per 1,000 | <b>5 more per 1,000</b><br>(from 153 fewer to 51 more)  |
| Safety                                  |         |             |             |         |      |             |                  |                   |                                   |               |                                                         |

|                                          |         |             |             |             |      |                  |                    |                    |                                     |                 |                                                           |
|------------------------------------------|---------|-------------|-------------|-------------|------|------------------|--------------------|--------------------|-------------------------------------|-----------------|-----------------------------------------------------------|
| 40<br>(1 RCT)                            | serious | not serious | not serious | serious     | none | ⊕⊕○○<br>LOW      | 20/20<br>(100.0%)  | 20/20<br>(100.0%)  | <b>OR 6.54</b><br>(0.83 to 51.70)   | 1,000 per 1,000 | <b>0 fewer per 1,000</b><br>(from 0 fewer to 0 fewer)     |
| AWS compared to MCL for Difficult airway |         |             |             |             |      |                  |                    |                    |                                     |                 |                                                           |
| Success                                  |         |             |             |             |      |                  |                    |                    |                                     |                 |                                                           |
| 305<br>(5 RCTs)                          | serious | not serious | not serious | serious     | none | ⊕⊕○○<br>LOW      | 131/152<br>(86.2%) | 130/153<br>(85.0%) | <b>OR 1.29</b><br>(0.49 to 3.38)    | 862 per 1,000   | <b>28 more per 1,000</b><br>(from 108 fewer to 93 more)   |
| Intubation time                          | N/A     |             |             |             |      |                  |                    |                    |                                     |                 |                                                           |
| Glottic view                             |         |             |             |             |      |                  |                    |                    |                                     |                 |                                                           |
| 711<br>(6 RCTs)                          | serious | not serious | not serious | not serious | none | ⊕⊕⊕○<br>MODERATE | 295/355<br>(83.1%) | 349/356<br>(98.0%) | <b>OR 49.84</b><br>(3.97 to 626.44) | 831 per 1,000   | <b>165 more per 1,000</b><br>(from 120 more to 169 more)  |
| Safety                                   |         |             |             |             |      |                  |                    |                    |                                     |                 |                                                           |
| 135<br>(2 RCTs)                          | serious | not serious | not serious | serious     | none | ⊕⊕○○<br>LOW      | 47/67<br>(70.1%)   | 44/68 (64.7%)      | <b>OR 0.78</b><br>(0.35 to 1.76)    | 701 per 1,000   | <b>54 fewer per 1,000</b><br>(from 250 fewer to 104 more) |
| AWS compared to GVL for Normal airway    |         |             |             |             |      |                  |                    |                    |                                     |                 |                                                           |
| Success                                  | N/A     |             |             |             |      |                  |                    |                    |                                     |                 |                                                           |
| Intubation time                          | N/A     |             |             |             |      |                  |                    |                    |                                     |                 |                                                           |
| Glottic view                             | N/A     |             |             |             |      |                  |                    |                    |                                     |                 |                                                           |

|                                          |         |             |             |             |      |                  |                   |                |                                    |                 |                                                           |
|------------------------------------------|---------|-------------|-------------|-------------|------|------------------|-------------------|----------------|------------------------------------|-----------------|-----------------------------------------------------------|
| Safety                                   | N/A     |             |             |             |      |                  |                   |                |                                    |                 |                                                           |
| AWS compared to GVL for Difficult airway |         |             |             |             |      |                  |                   |                |                                    |                 |                                                           |
| Success                                  |         |             |             |             |      |                  |                   |                |                                    |                 |                                                           |
| 180<br>(3 RCTs)                          | serious | not serious | not serious | serious     | none | ⊕⊕○○<br>LOW      | 79/90<br>(87.8%)  | 79/90 (87.8%)  | <b>OR 0.48</b><br>(0.16 to 1.42)   | 878 per 1,000   | <b>103 fewer per 1,000</b><br>(from 343 fewer to 33 more) |
| Intubation time                          |         |             |             |             |      |                  |                   |                |                                    |                 |                                                           |
| 70<br>(1 RCT)                            | serious | not serious | not serious | not serious | none | ⊕⊕⊕○<br>MODERATE | 35                | 35             | -                                  | -               | <b>SMD 0.97 SD lower</b><br>(1.47 lower to 0.48 lower)    |
| Glottic view                             |         |             |             |             |      |                  |                   |                |                                    |                 |                                                           |
| 180<br>(3 RCTs)                          | serious | not serious | not serious | serious     | none | ⊕⊕○○<br>LOW      | 90/90<br>(100.0%) | 90/90 (100.0%) | <b>OR 1.00</b><br>(0.01 to 102.05) | 1,000 per 1,000 | <b>0 fewer per 1,000</b><br>(from 0 fewer to 0 fewer)     |
| Safety                                   | N/A     |             |             |             |      |                  |                   |                |                                    |                 |                                                           |
| AWS compared to MG for Normal airway     |         |             |             |             |      |                  |                   |                |                                    |                 |                                                           |
| Success                                  |         |             |             |             |      |                  |                   |                |                                    |                 |                                                           |
| 140<br>(1 RCT)                           | serious | not serious | not serious | serious     | none | ⊕⊕○○<br>LOW      | 70/70<br>(100.0%) | 70/70 (100.0%) | <b>OR 1.55</b><br>(0.16 to 15.56)  | 1,000 per 1,000 | <b>0 fewer per 1,000</b><br>(from 0 fewer to 0 fewer)     |
| Intubation time                          |         |             |             |             |      |                  |                   |                |                                    |                 |                                                           |

|                                         |         |             |             |         |      |             |                  |                   |                                |                  |                                                            |
|-----------------------------------------|---------|-------------|-------------|---------|------|-------------|------------------|-------------------|--------------------------------|------------------|------------------------------------------------------------|
| 140<br>(1 RCT)                          | serious | not serious | not serious | serious | none | ⊕⊕○○<br>LOW | 70               | 70                | -                              | -                | SMD 0.17 SD<br>lower<br>(0.51 lower to<br>0.16 higher)     |
| Glottic view                            |         |             |             |         |      |             |                  |                   |                                |                  |                                                            |
| 140<br>(1 RCT)                          | serious | not serious | not serious | serious | none | ⊕⊕○○<br>LOW | 67/70<br>(95.7%) | 70/70<br>(100.0%) | OR 3.20<br>(0.05 to<br>218.49) | 957 per<br>1,000 | 29 more per<br>1,000<br>(from 430<br>fewer to 43<br>more)  |
| Safety                                  |         |             |             |         |      |             |                  |                   |                                |                  |                                                            |
| 140<br>(1 RCT)                          | serious | not serious | not serious | serious | none | ⊕⊕○○<br>LOW | 53/70<br>(75.7%) | 60/70 (85.7%)     | OR 1.56<br>(0.41 to<br>5.89)   | 757 per<br>1,000 | 72 more per<br>1,000<br>(from 196<br>fewer to 191<br>more) |
| AWS compared to MG for Difficult airway |         |             |             |         |      |             |                  |                   |                                |                  |                                                            |
| Success                                 | N/A     |             |             |         |      |             |                  |                   |                                |                  |                                                            |
| Intubation time                         | N/A     |             |             |         |      |             |                  |                   |                                |                  |                                                            |
| Glottic view                            | N/A     |             |             |         |      |             |                  |                   |                                |                  |                                                            |
| Safety                                  | N/A     |             |             |         |      |             |                  |                   |                                |                  |                                                            |
| CM compared to GVL for Normal airway    |         |             |             |         |      |             |                  |                   |                                |                  |                                                            |
| Success                                 | N/A     |             |             |         |      |             |                  |                   |                                |                  |                                                            |
| Intubation time                         | N/A     |             |             |         |      |             |                  |                   |                                |                  |                                                            |
| Glottic view                            | N/A     |             |             |         |      |             |                  |                   |                                |                  |                                                            |
| Safety                                  | N/A     |             |             |         |      |             |                  |                   |                                |                  |                                                            |

|                                         |         |             |             |         |      |             |                   |                   |                            |                 |                                                    |
|-----------------------------------------|---------|-------------|-------------|---------|------|-------------|-------------------|-------------------|----------------------------|-----------------|----------------------------------------------------|
| CM compared to GVL for Difficult airway |         |             |             |         |      |             |                   |                   |                            |                 |                                                    |
| Success                                 |         |             |             |         |      |             |                   |                   |                            |                 |                                                    |
| 56<br>(1 RCT)                           | serious | not serious | not serious | serious | none | ⊕⊕○○<br>LOW | 28/30<br>(93.3%)  | 15/26 (57.7%)     | OR 1.38<br>(0.44 to 4.35)  | 933 per 1,000   | 17 more per 1,000<br>(from 73 fewer to 51 more)    |
| Intubation time                         | N/A     |             |             |         |      |             |                   |                   |                            |                 |                                                    |
| Glottic view                            |         |             |             |         |      |             |                   |                   |                            |                 |                                                    |
| 56<br>(1 RCT)                           | serious | not serious | not serious | serious | none | ⊕⊕○○<br>LOW | 30/30<br>(100.0%) | 26/26<br>(100.0%) | OR 0.87<br>(0.01 to 89.19) | 1,000 per 1,000 | 0 fewer per 1,000<br>(from 0 fewer to 0 fewer)     |
| Safety                                  |         |             |             |         |      |             |                   |                   |                            |                 |                                                    |
| 56<br>(1 RCT)                           | serious | not serious | not serious | serious | none | ⊕⊕○○<br>LOW | 18/30<br>(60.0%)  | 17/26 (65.4%)     | OR 0.83<br>(0.33 to 2.13)  | 600 per 1,000   | 45 fewer per 1,000<br>(from 269 fewer to 162 more) |
| CM compared to MG for Normal airway     |         |             |             |         |      |             |                   |                   |                            |                 |                                                    |
| Success                                 | N/A     |             |             |         |      |             |                   |                   |                            |                 |                                                    |
| Intubation time                         | N/A     |             |             |         |      |             |                   |                   |                            |                 |                                                    |
| Glottic view                            | N/A     |             |             |         |      |             |                   |                   |                            |                 |                                                    |
| Safety                                  | N/A     |             |             |         |      |             |                   |                   |                            |                 |                                                    |
| CM compared to MG for Difficult airway  |         |             |             |         |      |             |                   |                   |                            |                 |                                                    |
| Success                                 |         |             |             |         |      |             |                   |                   |                            |                 |                                                    |

|                                        |         |             |             |         |      |             |                  |                   |                           |               |                                                      |
|----------------------------------------|---------|-------------|-------------|---------|------|-------------|------------------|-------------------|---------------------------|---------------|------------------------------------------------------|
| 130<br>(1 RCT)                         | serious | not serious | not serious | serious | none | ⊕⊕○○<br>LOW | 45/65<br>(69.2%) | 58/65 (89.2%)     | OR 0.94<br>(0.27 to 3.27) | 692 per 1,000 | 13 fewer per 1,000<br>(from 314 fewer to 188 more)   |
| Intubation time                        | N/A     |             |             |         |      |             |                  |                   |                           |               |                                                      |
| Glottic view                           | N/A     |             |             |         |      |             |                  |                   |                           |               |                                                      |
| Safety                                 | N/A     |             |             |         |      |             |                  |                   |                           |               |                                                      |
| CM compared to KV for Normal airway    |         |             |             |         |      |             |                  |                   |                           |               |                                                      |
| Success                                | N/A     |             |             |         |      |             |                  |                   |                           |               |                                                      |
| Intubation time                        | N/A     |             |             |         |      |             |                  |                   |                           |               |                                                      |
| Glottic view                           | N/A     |             |             |         |      |             |                  |                   |                           |               |                                                      |
| Safety                                 | N/A     |             |             |         |      |             |                  |                   |                           |               |                                                      |
| CM compared to KV for Difficult airway |         |             |             |         |      |             |                  |                   |                           |               |                                                      |
| Success                                |         |             |             |         |      |             |                  |                   |                           |               |                                                      |
| 90<br>(1 RCT)                          | serious | not serious | not serious | serious | none | ⊕⊕○○<br>LOW | 42/45<br>(93.3%) | 45/45<br>(100.0%) | RR 1.11<br>(0.29 to 4.25) | 933 per 1,000 | 103 more per 1,000<br>(from 663 fewer to 1,000 more) |
| Intubation time                        | N/A     |             |             |         |      |             |                  |                   |                           |               |                                                      |
| Glottic view                           |         |             |             |         |      |             |                  |                   |                           |               |                                                      |

|                                         |         |             |             |             |      |                  |                    |                    |                             |                 |                                                  |
|-----------------------------------------|---------|-------------|-------------|-------------|------|------------------|--------------------|--------------------|-----------------------------|-----------------|--------------------------------------------------|
| 90<br>(1 RCT)                           | serious | not serious | not serious | serious     | none | ⊕⊕○○<br>LOW      | 45/45<br>(100.0%)  | 45/45<br>(100.0%)  | OR 0.03<br>(0.00 to 23.44)  | 1,000 per 1,000 | 0 fewer per 1,000<br>(from 0 fewer to --)        |
| Safety                                  | N/A     |             |             |             |      |                  |                    |                    |                             |                 |                                                  |
| CM compared to MCL for Normal airway    |         |             |             |             |      |                  |                    |                    |                             |                 |                                                  |
| Success                                 | N/A     |             |             |             |      |                  |                    |                    |                             |                 |                                                  |
| Intubation time                         |         |             |             |             |      |                  |                    |                    |                             |                 |                                                  |
| 78<br>(1 RCT)                           | serious | not serious | not serious | not serious | none | ⊕⊕⊕○<br>MODERATE | 39                 | 39                 | -                           | -               | SMD 1.53 SD lower<br>(2.04 lower to 1.02 lower)  |
| Glottic view                            |         |             |             |             |      |                  |                    |                    |                             |                 |                                                  |
| 78<br>(1 RCT)                           | serious | not serious | not serious | serious     | none | ⊕⊕○○<br>LOW      | 39/39<br>(100.0%)  | 39/39<br>(100.0%)  | OR 2.29<br>(0.01 to 487.52) | 1,000 per 1,000 | 0 fewer per 1,000<br>(from 0 fewer to 0 fewer)   |
| Safety                                  |         |             |             |             |      |                  |                    |                    |                             |                 |                                                  |
| 78<br>(1 RCT)                           | serious | not serious | not serious | serious     | none | ⊕⊕○○<br>LOW      | 39/39<br>(100.0%)  | 39/39<br>(100.0%)  | OR 1.00<br>(0.02 to 59.45)  | 1,000 per 1,000 | 0 fewer per 1,000<br>(from 0 fewer to 0 fewer)   |
| CM compared to MCL for Difficult airway |         |             |             |             |      |                  |                    |                    |                             |                 |                                                  |
| Success                                 |         |             |             |             |      |                  |                    |                    |                             |                 |                                                  |
| 289<br>(4 RCTs)                         | serious | not serious | not serious | serious     | none | ⊕⊕○○<br>LOW      | 126/145<br>(86.9%) | 139/144<br>(96.5%) | OR 1.11<br>(0.29 to 4.25)   | 869 per 1,000   | 11 more per 1,000<br>(from 211 fewer to 97 more) |

| Intubation time                        |         |             |             |             |      |                  |                    |                    |                                     |               |                                                          |
|----------------------------------------|---------|-------------|-------------|-------------|------|------------------|--------------------|--------------------|-------------------------------------|---------------|----------------------------------------------------------|
| 90<br>(1 RCT)                          | serious | not serious | not serious | not serious | none | ⊕⊕⊕○<br>MODERATE | 45                 | 45                 | -                                   | -             | SMD <b>0.76 SD lower</b><br>(1.19 lower to 0.33 lower)   |
| Glottic view                           |         |             |             |             |      |                  |                    |                    |                                     |               |                                                          |
| 210<br>(3 RCTs)                        | serious | not serious | not serious | serious     | none | ⊕⊕○○<br>LOW      | 80/105<br>(76.2%)  | 97/105<br>(92.4%)  | <b>OR 2.77</b><br>(0.00 to 3219.78) | 762 per 1,000 | <b>137 more per 1,000</b><br>(from -- to 238 more)       |
| Safety                                 |         |             |             |             |      |                  |                    |                    |                                     |               |                                                          |
| 75<br>(1 RCT)                          | serious | not serious | not serious | serious     | none | ⊕⊕○○<br>LOW      | 32/36<br>(88.9%)   | 31/39 (79.5%)      | <b>OR 0.86</b><br>(0.31 to 2.44)    | 889 per 1,000 | <b>16 fewer per 1,000</b><br>(from 176 fewer to 62 more) |
| KV compared to MG for Normal airway    |         |             |             |             |      |                  |                    |                    |                                     |               |                                                          |
| Success                                | N/A     |             |             |             |      |                  |                    |                    |                                     |               |                                                          |
| Intubation time                        | N/A     |             |             |             |      |                  |                    |                    |                                     |               |                                                          |
| Glottic view                           | N/A     |             |             |             |      |                  |                    |                    |                                     |               |                                                          |
| Safety                                 | N/A     |             |             |             |      |                  |                    |                    |                                     |               |                                                          |
| KV compared to MG for Difficult airway |         |             |             |             |      |                  |                    |                    |                                     |               |                                                          |
| Success                                |         |             |             |             |      |                  |                    |                    |                                     |               |                                                          |
| 240<br>(1 RCT)                         | serious | not serious | not serious | serious     | none | ⊕⊕○○<br>LOW      | 117/120<br>(97.5%) | 104/120<br>(86.7%) | <b>OR 0.84</b><br>(0.23 to 3.08)    | 975 per 1,000 | <b>5 fewer per 1,000</b><br>(from 75 fewer to 17 more)   |



|                                      |         |             |             |             |      |             |                    |                    |                                   |               |                                                          |
|--------------------------------------|---------|-------------|-------------|-------------|------|-------------|--------------------|--------------------|-----------------------------------|---------------|----------------------------------------------------------|
| Intubation time                      |         |             |             |             |      |             |                    |                    |                                   |               |                                                          |
| 240<br>(1 RCT)                       | serious | not serious | not serious | serious     | none | ⊕⊕○○<br>LOW | 120                | 120                | -                                 | -             | SMD <b>0.15 SD higher</b><br>(0.11 lower to 0.4 higher)  |
| Glottic view                         | N/A     |             |             |             |      |             |                    |                    |                                   |               |                                                          |
| Safety                               | N/A     |             |             |             |      |             |                    |                    |                                   |               |                                                          |
| KV compared to MCL for Normal airway |         |             |             |             |      |             |                    |                    |                                   |               |                                                          |
| Success                              |         |             |             |             |      |             |                    |                    |                                   |               |                                                          |
| 266<br>(4 RCTs)                      | serious | not serious | not serious | serious     | none | ⊕⊕○○<br>LOW | 114/133<br>(85.7%) | 122/133<br>(91.7%) | <b>OR 1.83</b><br>(0.76 to 4.40)  | 857 per 1,000 | <b>59 more per 1,000</b><br>(from 37 fewer to 106 more)  |
| Intubation time                      |         |             |             |             |      |             |                    |                    |                                   |               |                                                          |
| 144<br>(2 RCTs)                      | serious | serious     | not serious | not serious | none | ⊕⊕○○<br>LOW | 72                 | 72                 | -                                 | -             | SMD <b>0.22 SD higher</b><br>(2.03 lower to 2.47 higher) |
| Glottic view                         |         |             |             |             |      |             |                    |                    |                                   |               |                                                          |
| 266<br>(4 RCTs)                      | serious | not serious | not serious | serious     | none | ⊕⊕○○<br>LOW | 117/133<br>(88.0%) | 124/133<br>(93.2%) | <b>OR 1.09</b><br>(0.06 to 19.66) | 880 per 1,000 | <b>9 more per 1,000</b><br>(from 575 fewer to 113 more)  |
| Safety                               |         |             |             |             |      |             |                    |                    |                                   |               |                                                          |

|                                         |         |             |             |             |      |                  |                   |                    |                                     |               |                                                           |
|-----------------------------------------|---------|-------------|-------------|-------------|------|------------------|-------------------|--------------------|-------------------------------------|---------------|-----------------------------------------------------------|
| 108<br>(2 RCTs)                         | serious | serious     | not serious | not serious | none | ⊕⊕○○<br>LOW      | 33/54<br>(61.1%)  | 41/54 (75.9%)      | <b>OR 2.44</b><br>(0.75 to 7.95)    | 611 per 1,000 | <b>182 more per 1,000</b><br>(from 70 fewer to 315 more)  |
| KV compared to MCL for Difficult airway |         |             |             |             |      |                  |                   |                    |                                     |               |                                                           |
| Success                                 |         |             |             |             |      |                  |                   |                    |                                     |               |                                                           |
| 300<br>(2 RCTs)                         | serious | not serious | not serious | not serious | none | ⊕⊕⊕○<br>MODERATE | 80/150<br>(53.3%) | 137/150<br>(91.3%) | <b>OR 3.31</b><br>(1.14 to 9.56)    | 533 per 1,000 | <b>258 more per 1,000</b><br>(from 32 more to 383 more)   |
| Intubation time                         | N/A     |             |             |             |      |                  |                   |                    |                                     |               |                                                           |
| Glottic view                            |         |             |             |             |      |                  |                   |                    |                                     |               |                                                           |
| 300<br>(2 RCTs)                         | serious | not serious | not serious | serious     | none | ⊕⊕○○<br>LOW      | 41/150<br>(27.3%) | 144/150<br>(96.0%) | <b>OR 6.53</b><br>(0.01 to 4461.53) | 273 per 1,000 | <b>437 more per 1,000</b><br>(from 270 fewer to 726 more) |
| Safety                                  |         |             |             |             |      |                  |                   |                    |                                     |               |                                                           |
| 240<br>(1 RCT)                          | serious | not serious | not serious | serious     | none | ⊕⊕○○<br>LOW      | 92/120<br>(76.7%) | 94/120<br>(78.3%)  | <b>OR 1.12</b><br>(0.59 to 2.21)    | 767 per 1,000 | <b>20 more per 1,000</b><br>(from 107 fewer to 112 more)  |
| CMD compared to MG for Normal airway    |         |             |             |             |      |                  |                   |                    |                                     |               |                                                           |
| Success                                 | N/A     |             |             |             |      |                  |                   |                    |                                     |               |                                                           |
| Intubation time                         | N/A     |             |             |             |      |                  |                   |                    |                                     |               |                                                           |
| Glottic view                            | N/A     |             |             |             |      |                  |                   |                    |                                     |               |                                                           |

|                                         |         |             |             |             |      |             |                    |                    |                           |               |                                                   |
|-----------------------------------------|---------|-------------|-------------|-------------|------|-------------|--------------------|--------------------|---------------------------|---------------|---------------------------------------------------|
| Safety                                  | N/A     |             |             |             |      |             |                    |                    |                           |               |                                                   |
| CMD compared to MG for Difficult airway |         |             |             |             |      |             |                    |                    |                           |               |                                                   |
| Success                                 |         |             |             |             |      |             |                    |                    |                           |               |                                                   |
| 320<br>(2 RCTs)                         | serious | not serious | not serious | serious     | none | ⊕⊕○○<br>LOW | 154/160<br>(96.3%) | 151/160<br>(94.4%) | OR 1.54<br>(0.39 to 6.13) | 963 per 1,000 | 13 more per 1,000<br>(from 53 fewer to 31 more)   |
| Intubation time                         |         |             |             |             |      |             |                    |                    |                           |               |                                                   |
| 320<br>(2 RCTs)                         | serious | serious     | not serious | not serious | none | ⊕⊕○○<br>LOW | 160                | 160                | -                         | -             | SMD 0.52 SD lower<br>(1.9 lower to 0.86 higher)   |
| Glottic view                            | N/A     |             |             |             |      |             |                    |                    |                           |               |                                                   |
| Safety                                  | N/A     |             |             |             |      |             |                    |                    |                           |               |                                                   |
| CMD compared to KV for Normal airway    |         |             |             |             |      |             |                    |                    |                           |               |                                                   |
| Success                                 |         |             |             |             |      |             |                    |                    |                           |               |                                                   |
| 100<br>(1 RCT)                          | serious | not serious | not serious | serious     | none | ⊕⊕○○<br>LOW | 47/50<br>(94.0%)   | 48/50 (96.0%)      | OR 0.67<br>(0.19 to 2.34) | 940 per 1,000 | 27 fewer per 1,000<br>(from 191 fewer to 33 more) |
| Intubation time                         | N/A     |             |             |             |      |             |                    |                    |                           |               |                                                   |
| Glottic view                            | N/A     |             |             |             |      |             |                    |                    |                           |               |                                                   |
| Safety                                  | N/A     |             |             |             |      |             |                    |                    |                           |               |                                                   |
| CMD compared to KV for Difficult airway |         |             |             |             |      |             |                    |                    |                           |               |                                                   |
| Success                                 |         |             |             |             |      |             |                    |                    |                           |               |                                                   |

|                                          |         |             |             |         |      |                                          |                    |                    |                                  |               |                                                          |
|------------------------------------------|---------|-------------|-------------|---------|------|------------------------------------------|--------------------|--------------------|----------------------------------|---------------|----------------------------------------------------------|
| 303<br>(2 RCTs)                          | serious | not serious | not serious | serious | none | <div><div>⊕⊕○○</div><div>LOW</div></div> | 127/151<br>(84.1%) | 141/152<br>(92.8%) | <b>OR 1.83</b><br>(0.50 to 6.69) | 841 per 1,000 | <b>65 more per 1,000</b><br>(from 115 fewer to 131 more) |
| Intubation time                          |         |             |             |         |      |                                          |                    |                    |                                  |               |                                                          |
| 303<br>(2 RCTs)                          | serious | not serious | not serious | serious | none | <div><div>⊕⊕○○</div><div>LOW</div></div> | 151                | 152                | -                                | -             | <b>SMD 0 SD</b><br>(0.22 lower to 0.23 higher)           |
| Glottic view                             | N/A     |             |             |         |      |                                          |                    |                    |                                  |               |                                                          |
| Safety                                   | N/A     |             |             |         |      |                                          |                    |                    |                                  |               |                                                          |
| CMD compared to GVL for Normal airway    |         |             |             |         |      |                                          |                    |                    |                                  |               |                                                          |
| Success                                  | N/A     |             |             |         |      |                                          |                    |                    |                                  |               |                                                          |
| Intubation time                          | N/A     |             |             |         |      |                                          |                    |                    |                                  |               |                                                          |
| Glottic view                             | N/A     |             |             |         |      |                                          |                    |                    |                                  |               |                                                          |
| Safety                                   | N/A     |             |             |         |      |                                          |                    |                    |                                  |               |                                                          |
| CMD compared to GVL for Difficult airway |         |             |             |         |      |                                          |                    |                    |                                  |               |                                                          |
| Success                                  |         |             |             |         |      |                                          |                    |                    |                                  |               |                                                          |
| 240<br>(1 RCT)                           | serious | not serious | not serious | serious | none | <div><div>⊕⊕○○</div><div>LOW</div></div> | 102/120<br>(85.0%) | 114/120<br>(95.0%) | <b>OR 2.26</b><br>(0.57 to 8.92) | 850 per 1,000 | <b>78 more per 1,000</b><br>(from 86 fewer to 131 more)  |
| Intubation time                          |         |             |             |         |      |                                          |                    |                    |                                  |               |                                                          |

|                                       |         |             |             |             |      |                  |                  |                   |                                        |               |                                                          |
|---------------------------------------|---------|-------------|-------------|-------------|------|------------------|------------------|-------------------|----------------------------------------|---------------|----------------------------------------------------------|
| 240<br>(1 RCT)                        | serious | not serious | not serious | serious     | none | ⊕⊕○○<br>LOW      | 120              | 120               | -                                      | -             | SMD <b>0.2 SD lower</b><br>(0.45 lower to 0.06 higher)   |
| Glottic view                          | N/A     |             |             |             |      |                  |                  |                   |                                        |               |                                                          |
| Safety                                | N/A     |             |             |             |      |                  |                  |                   |                                        |               |                                                          |
| CMD compared to MCL for Normal airway |         |             |             |             |      |                  |                  |                   |                                        |               |                                                          |
| Success                               |         |             |             |             |      |                  |                  |                   |                                        |               |                                                          |
| 182<br>(2 RCTs)                       | serious | not serious | not serious | serious     | none | ⊕⊕○○<br>LOW      | 80/91<br>(87.9%) | 79/91 (86.8%)     | OR <b>1.22</b><br>(0.41 to 3.65)       | 879 per 1,000 | 20 more per <b>1,000</b><br>(from 130 fewer to 85 more)  |
| Intubation time                       |         |             |             |             |      |                  |                  |                   |                                        |               |                                                          |
| 52<br>(1 RCT)                         | serious | not serious | not serious | serious     | none | ⊕⊕○○<br>LOW      | 26               | 26                | -                                      | -             | SMD <b>0.04 SD lower</b><br>(0.59 lower to 0.5 higher)   |
| Glottic view                          |         |             |             |             |      |                  |                  |                   |                                        |               |                                                          |
| 52<br>(1 RCT)                         | serious | not serious | not serious | serious     | none | ⊕⊕○○<br>LOW      | 24/26<br>(92.3%) | 26/26<br>(100.0%) | OR <b>3.54</b><br>(0.26 to 48.31)      | 923 per 1,000 | 54 more per <b>1,000</b><br>(from 166 fewer to 75 more)  |
| Safety                                |         |             |             |             |      |                  |                  |                   |                                        |               |                                                          |
| 130<br>(1 RCT)                        | serious | not serious | not serious | not serious | none | ⊕⊕⊕○<br>MODERATE | 21/65<br>(32.3%) | 65/65<br>(100.0%) | OR <b>271.14</b><br>(13.20 to 5568.91) | 323 per 1,000 | 669 more per <b>1,000</b><br>(from 540 more to 677 more) |

|                                          |         |             |             |             |      |                  |                   |                   |                            |                 |                                                 |
|------------------------------------------|---------|-------------|-------------|-------------|------|------------------|-------------------|-------------------|----------------------------|-----------------|-------------------------------------------------|
| CMD compared to MCL for Difficult airway |         |             |             |             |      |                  |                   |                   |                            |                 |                                                 |
| Success                                  | N/A     |             |             |             |      |                  |                   |                   |                            |                 |                                                 |
| Intubation time                          | N/A     |             |             |             |      |                  |                   |                   |                            |                 |                                                 |
| Glottic view                             | N/A     |             |             |             |      |                  |                   |                   |                            |                 |                                                 |
| Safety                                   | N/A     |             |             |             |      |                  |                   |                   |                            |                 |                                                 |
| GVL compared to MG for Normal airway     |         |             |             |             |      |                  |                   |                   |                            |                 |                                                 |
| Success                                  |         |             |             |             |      |                  |                   |                   |                            |                 |                                                 |
| 106<br>(2 RCTs)                          | serious | not serious | not serious | serious     | none | ⊕⊕○○<br>LOW      | 52/53<br>(98.1%)  | 50/53 (94.3%)     | OR 1.41<br>(0.50 to 3.97)  | 981 per 1,000   | 5 more per 1,000<br>(from 18 fewer to 14 more)  |
| Intubation time                          |         |             |             |             |      |                  |                   |                   |                            |                 |                                                 |
| 56<br>(1 RCT)                            | serious | not serious | not serious | not serious | none | ⊕⊕⊕○<br>MODERATE | 28                | 28                | -                          | -               | SMD 0.81 SD lower<br>(1.36 lower to 0.27 lower) |
| Glottic view                             |         |             |             |             |      |                  |                   |                   |                            |                 |                                                 |
| 106<br>(2 RCTs)                          | serious | not serious | not serious | serious     | none | ⊕⊕○○<br>LOW      | 53/53<br>(100.0%) | 53/53<br>(100.0%) | OR 0.97<br>(0.03 to 26.85) | 1,000 per 1,000 | 0 fewer per 1,000<br>(from 0 fewer to 0 fewer)  |
| Safety                                   | N/A     |             |             |             |      |                  |                   |                   |                            |                 |                                                 |
| GVL compared to MG for Difficult airway  |         |             |             |             |      |                  |                   |                   |                            |                 |                                                 |
| Success                                  |         |             |             |             |      |                  |                   |                   |                            |                 |                                                 |

|                                      |         |             |             |             |      |                  |                    |                    |                              |                    |                                                            |
|--------------------------------------|---------|-------------|-------------|-------------|------|------------------|--------------------|--------------------|------------------------------|--------------------|------------------------------------------------------------|
| 300<br>(2 RCTs)                      | serious | not serious | not serious | serious     | none | ⊕⊕○○<br>LOW      | 138/150<br>(92.0%) | 130/150<br>(86.7%) | OR 0.68<br>(0.22 to 2.11)    | 920 per<br>1,000   | 33 fewer per<br>1,000<br>(from 203<br>fewer to 40<br>more) |
| Intubation time                      |         |             |             |             |      |                  |                    |                    |                              |                    |                                                            |
| 300<br>(2 RCTs)                      | serious | not serious | not serious | not serious | none | ⊕⊕⊕○<br>MODERATE | 150                | 150                | -                            | -                  | SMD 0.32 SD<br>higher<br>(0.1 higher to<br>0.55 higher)    |
| Glottic view                         |         |             |             |             |      |                  |                    |                    |                              |                    |                                                            |
| 60<br>(1 RCT)                        | serious | not serious | not serious | serious     | none | ⊕⊕○○<br>LOW      | 30/30<br>(100.0%)  | 28/30 (93.3%)      | OR 0.19<br>(0.00 to<br>9.33) | 1,000 per<br>1,000 | 0 fewer per<br>1,000<br>(from 0 fewer<br>to --)            |
| Safety                               |         |             |             |             |      |                  |                    |                    |                              |                    |                                                            |
| 60<br>(1 RCT)                        | serious | not serious | not serious | serious     | none | ⊕⊕○○<br>LOW      | 19/30<br>(63.3%)   | 23/30 (76.7%)      | OR 1.19<br>(0.47 to<br>2.98) | 633 per<br>1,000   | 39 more per<br>1,000<br>(from 185<br>fewer to 204<br>more) |
| MCL compared to MG for Normal airway |         |             |             |             |      |                  |                    |                    |                              |                    |                                                            |
| Success                              |         |             |             |             |      |                  |                    |                    |                              |                    |                                                            |
| 263<br>(4 RCTs)                      | serious | serious     | not serious | not serious | none | ⊕⊕○○<br>LOW      | 125/132<br>(94.7%) | 123/131<br>(93.9%) | OR 0.91<br>(0.34 to<br>2.39) | 947 per<br>1,000   | 5 fewer per<br>1,000<br>(from 88<br>fewer to 30<br>more)   |
| Intubation time                      |         |             |             |             |      |                  |                    |                    |                              |                    |                                                            |

|                                         |         |             |             |             |      |                  |                    |                   |                                    |                 |                                                           |
|-----------------------------------------|---------|-------------|-------------|-------------|------|------------------|--------------------|-------------------|------------------------------------|-----------------|-----------------------------------------------------------|
| 113<br>(2 RCTs)                         | serious | not serious | not serious | serious     | none | ⊕⊕○○<br>LOW      | 57                 | 56                | -                                  | -               | SMD <b>0.79 SD lower</b><br>(1.64 lower to 0.06 higher)   |
| Glottic view                            |         |             |             |             |      |                  |                    |                   |                                    |                 |                                                           |
| 163<br>(3 RCTs)                         | serious | not serious | not serious | serious     | none | ⊕⊕○○<br>LOW      | 82/82<br>(100.0%)  | 75/81 (92.6%)     | <b>OR 0.18</b><br>(0.01 to 5.51)   | 1,000 per 1,000 | <b>0 fewer per 1,000</b><br>(from 0 fewer to 0 fewer)     |
| Safety                                  | N/A     |             |             |             |      |                  |                    |                   |                                    |                 |                                                           |
| MCL compared to MG for Difficult airway |         |             |             |             |      |                  |                    |                   |                                    |                 |                                                           |
| Success                                 |         |             |             |             |      |                  |                    |                   |                                    |                 |                                                           |
| 93<br>(2 RCTs)                          | serious | not serious | not serious | not serious | none | ⊕⊕⊕○<br>MODERATE | 45/46<br>(97.8%)   | 35/47 (74.5%)     | <b>OR 0.25</b><br>(0.08 to 0.76)   | 978 per 1,000   | <b>60 fewer per 1,000</b><br>(from 196 fewer to 7 fewer)  |
| Intubation time                         |         |             |             |             |      |                  |                    |                   |                                    |                 |                                                           |
| 193<br>(3 RCTs)                         | serious | not serious | not serious | not serious | none | ⊕⊕⊕○<br>MODERATE | 96                 | 97                | -                                  | -               | SMD <b>0.92 SD higher</b><br>(0.62 higher to 1.22 higher) |
| Glottic view                            |         |             |             |             |      |                  |                    |                   |                                    |                 |                                                           |
| 242<br>(3 RCTs)                         | serious | not serious | not serious | serious     | none | ⊕⊕○○<br>LOW      | 118/121<br>(97.5%) | 70/121<br>(57.9%) | <b>OR 0.03</b><br>(0.00 to 100.82) | 975 per 1,000   | <b>434 fewer per 1,000</b><br>(from -- to 25 more)        |
| Safety                                  |         |             |             |             |      |                  |                    |                   |                                    |                 |                                                           |



|                                         |         |             |             |             |      |                  |                  |               |                                  |               |                                                           |
|-----------------------------------------|---------|-------------|-------------|-------------|------|------------------|------------------|---------------|----------------------------------|---------------|-----------------------------------------------------------|
| 128<br>(1 RCT)                          | serious | not serious | not serious | serious     | none | ⊕⊕○○<br>LOW      | 40/64<br>(62.5%) | 39/64 (60.9%) | <b>OR 1.14</b><br>(0.54 to 2.45) | 625 per 1,000 | <b>30 more per 1,000</b><br>(from 151 fewer to 178 more)  |
| GVL compared to KV for Normal airway    |         |             |             |             |      |                  |                  |               |                                  |               |                                                           |
| Success                                 |         |             |             |             |      |                  |                  |               |                                  |               |                                                           |
| 109<br>(2 RCTs)                         | serious | not serious | not serious | serious     | none | ⊕⊕○○<br>LOW      | 47/54<br>(87.0%) | 49/55 (89.1%) | <b>OR 0.85</b><br>(0.32 to 2.25) | 870 per 1,000 | <b>19 fewer per 1,000</b><br>(from 188 fewer to 68 more)  |
| Intubation time                         |         |             |             |             |      |                  |                  |               |                                  |               |                                                           |
| 43<br>(1 RCT)                           | serious | not serious | not serious | not serious | none | ⊕⊕⊕○<br>MODERATE | 22               | 21            | -                                | -             | <b>SMD 0.82 SD lower</b><br>(1.44 lower to 0.19 lower)    |
| Glottic view                            |         |             |             |             |      |                  |                  |               |                                  |               |                                                           |
| 109<br>(2 RCTs)                         | serious | not serious | not serious | serious     | none | ⊕⊕○○<br>LOW      | 47/54<br>(87.0%) | 48/55 (87.3%) | <b>OR 1.10</b><br>(0.21 to 5.73) | 870 per 1,000 | <b>10 more per 1,000</b><br>(from 285 fewer to 104 more)  |
| Safety                                  |         |             |             |             |      |                  |                  |               |                                  |               |                                                           |
| 109<br>(2 RCTs)                         | serious | not serious | not serious | serious     | none | ⊕⊕○○<br>LOW      | 41/54<br>(75.9%) | 34/55 (61.8%) | <b>OR 0.46</b><br>(0.15 to 1.46) | 759 per 1,000 | <b>167 fewer per 1,000</b><br>(from 438 fewer to 62 more) |
| GVL compared to KV for Difficult airway |         |             |             |             |      |                  |                  |               |                                  |               |                                                           |
| Success                                 |         |             |             |             |      |                  |                  |               |                                  |               |                                                           |

|                                       |         |             |             |             |      |             |                    |                    |                             |                  |                                                             |
|---------------------------------------|---------|-------------|-------------|-------------|------|-------------|--------------------|--------------------|-----------------------------|------------------|-------------------------------------------------------------|
| 240<br>(1 RCT)                        | serious | not serious | not serious | serious     | none | ⊕⊕○○<br>LOW | 104/120<br>(86.7%) | 102/120<br>(85.0%) | OR 0.81<br>(0.26 to 2.53)   | 867 per<br>1,000 | 26 fewer per<br>1,000<br>(from 238<br>fewer to 76<br>more)  |
| Intubation time                       |         |             |             |             |      |             |                    |                    |                             |                  |                                                             |
| 240<br>(1 RCT)                        | serious | not serious | not serious | serious     | none | ⊕⊕○○<br>LOW | 120                | 120                | -                           | -                | SMD 0.24 SD<br>higher<br>(0.01 lower to<br>0.5 higher)      |
| Glottic view                          | N/A     |             |             |             |      |             |                    |                    |                             |                  |                                                             |
| Safety                                | N/A     |             |             |             |      |             |                    |                    |                             |                  |                                                             |
| GVL compared to MCL for Normal airway |         |             |             |             |      |             |                    |                    |                             |                  |                                                             |
| Success                               |         |             |             |             |      |             |                    |                    |                             |                  |                                                             |
| 944<br>(10 RCTs)                      | serious | serious     | not serious | not serious | none | ⊕⊕○○<br>LOW | 420/474<br>(88.6%) | 440/470<br>(93.6%) | OR 1.55<br>(0.88 to 2.73)   | 886 per<br>1,000 | 37 more per<br>1,000<br>(from 14<br>fewer to 69<br>more)    |
| Intubation time                       |         |             |             |             |      |             |                    |                    |                             |                  |                                                             |
| 413<br>(5 RCTs)                       | serious | serious     | not serious | not serious | none | ⊕⊕○○<br>LOW | 207                | 206                | -                           | -                | SMD 0.06 SD<br>higher<br>(0.54 lower to<br>0.66 higher)     |
| Glottic view                          |         |             |             |             |      |             |                    |                    |                             |                  |                                                             |
| 739<br>(7 RCTs)                       | serious | serious     | not serious | not serious | none | ⊕⊕○○<br>LOW | 325/369<br>(88.1%) | 334/370<br>(90.3%) | OR 0.91<br>(0.01 to 148.39) | 881 per<br>1,000 | 10 fewer per<br>1,000<br>(from 812<br>fewer to 118<br>more) |

|                                                 |         |             |             |             |      |                  |                    |                    |                                     |               |                                                        |
|-------------------------------------------------|---------|-------------|-------------|-------------|------|------------------|--------------------|--------------------|-------------------------------------|---------------|--------------------------------------------------------|
| <b>Safety</b>                                   |         |             |             |             |      |                  |                    |                    |                                     |               |                                                        |
| 689<br>(8 RCTs)                                 | serious | not serious | not serious | serious     | none | ⊕⊕○○<br>LOW      | 277/344<br>(80.5%) | 288/345<br>(83.5%) | <b>OR 1.13</b><br>(0.59 to 2.15)    | 805 per 1,000 | <b>18 more per 1,000</b><br>(from 96 fewer to 94 more) |
| <b>GVL compared to MCL for Difficult airway</b> |         |             |             |             |      |                  |                    |                    |                                     |               |                                                        |
| <b>Success</b>                                  |         |             |             |             |      |                  |                    |                    |                                     |               |                                                        |
| 504<br>(7 RCTs)                                 | serious | not serious | not serious | not serious | none | ⊕⊕⊕○<br>MODERATE | 237/251<br>(94.4%) | 240/253<br>(94.9%) | <b>OR 2.68</b><br>(1.23 to 5.81)    | 944 per 1,000 | <b>34 more per 1,000</b><br>(from 10 more to 46 more)  |
| <b>Intubation time</b>                          |         |             |             |             |      |                  |                    |                    |                                     |               |                                                        |
| 60<br>(1 RCT)                                   | serious | not serious | not serious | not serious | none | ⊕⊕⊕○<br>MODERATE | 30                 | 30                 | -                                   | -             | <b>SMD 0.6 SD lower</b><br>(1.12 lower to 0.08 lower)  |
| <b>Glottic view</b>                             |         |             |             |             |      |                  |                    |                    |                                     |               |                                                        |
| 366<br>(4 RCTs)                                 | serious | not serious | not serious | serious     | none | ⊕⊕○○<br>LOW      | 100/181<br>(55.2%) | 171/185<br>(92.4%) | <b>OR 1.44</b><br>(0.00 to 1221.23) | 552 per 1,000 | <b>88 more per 1,000</b><br>(from -- to 447 more)      |
| <b>Safety</b>                                   | N/A     |             |             |             |      |                  |                    |                    |                                     |               |                                                        |

**CI:** Confidence interval; **OR:** Odds ratio; **SMD:** Standardised mean difference; N/A: Not available
