# Supplementary material for: Comparisons of Videolaryngoscopes for Intubation Undergoing General Anesthesia: Systematic Review and Network Meta-Analysis of Randomized Controlled Trials
Source: MDPI journal article supplement (doi:10.3390/jpm12030363), 2022-02-26
Supplement: s1 [file s1]

(A)

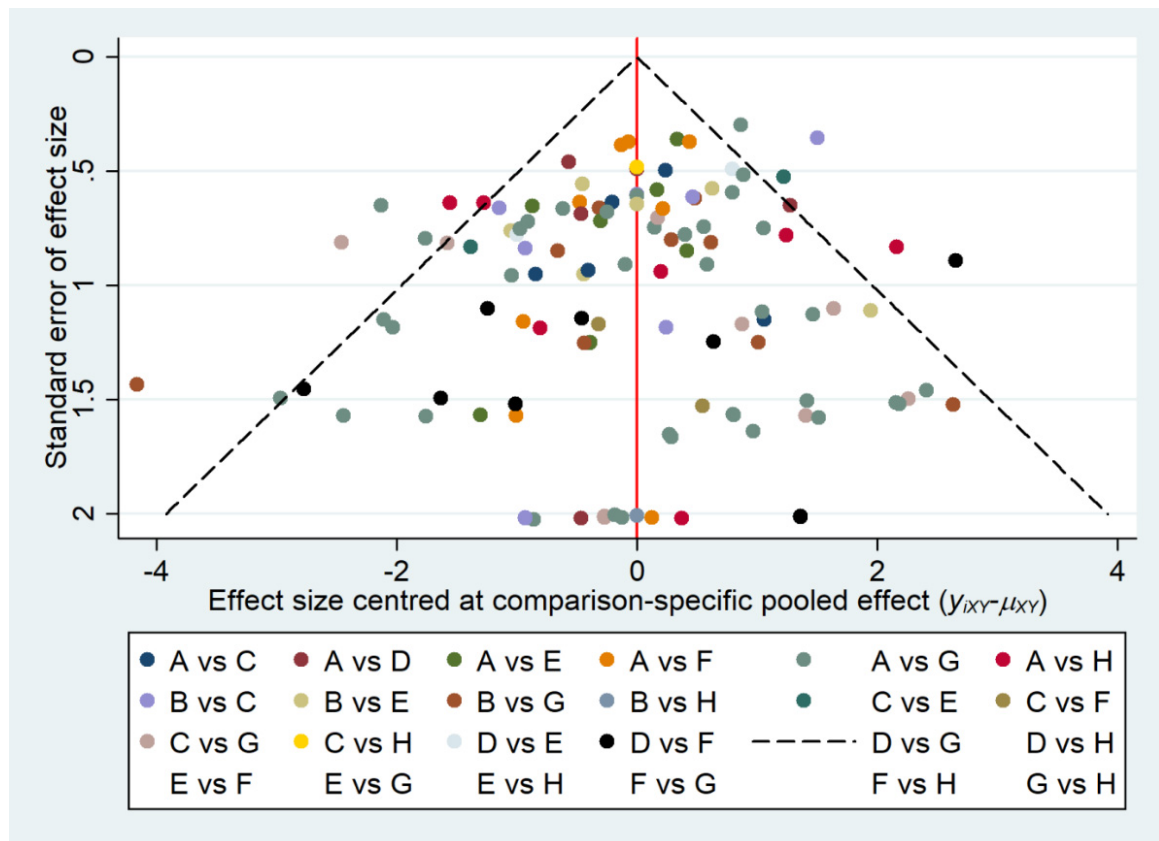

(B)

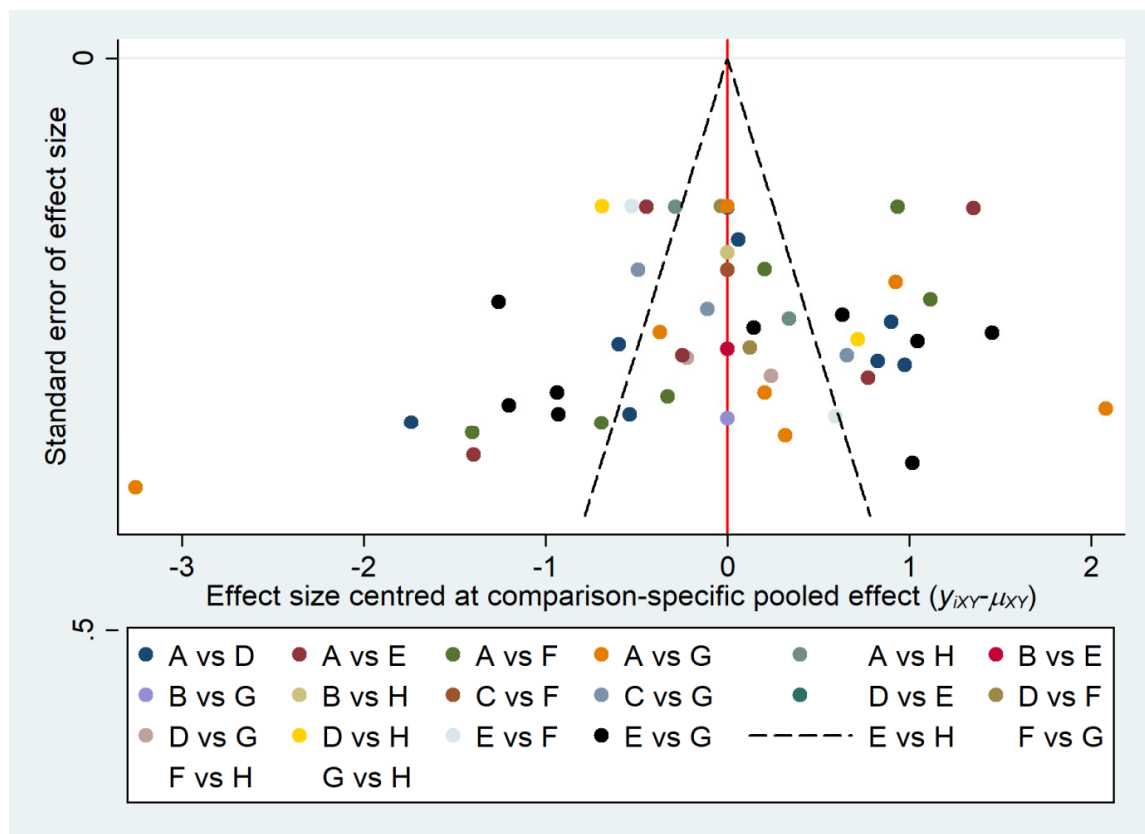

(C)

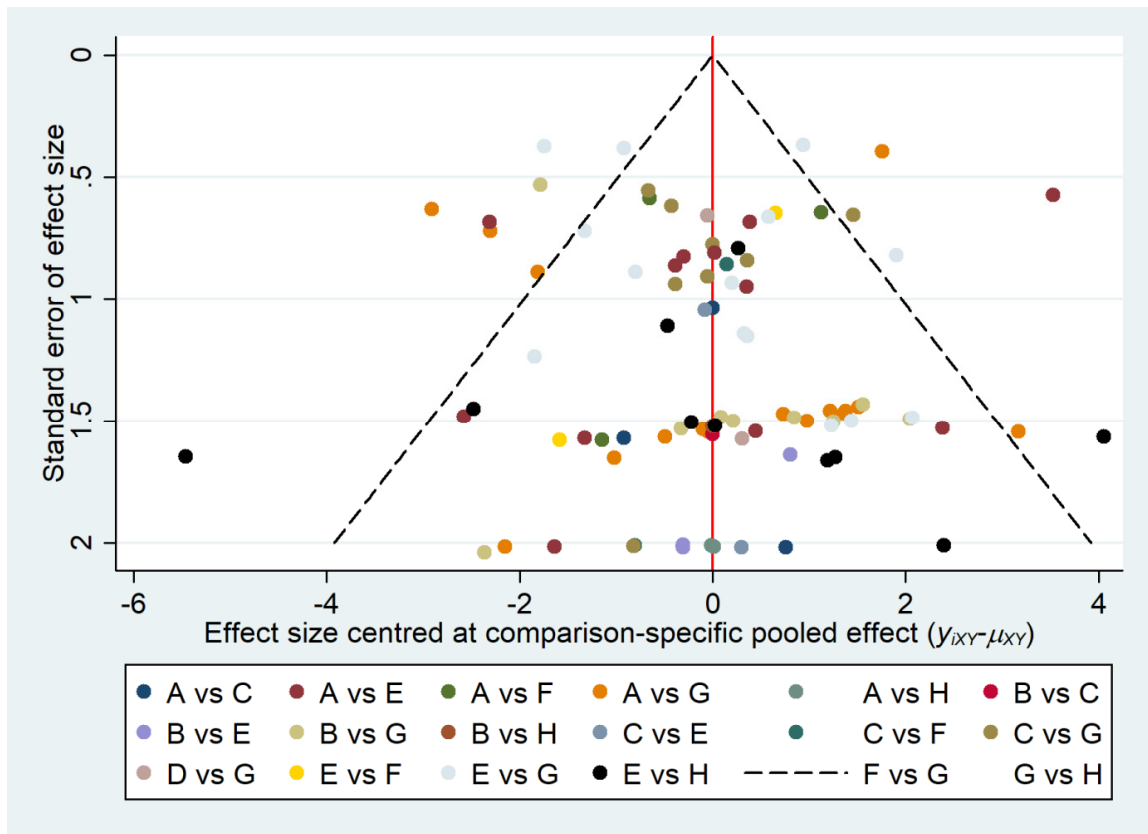

(D)

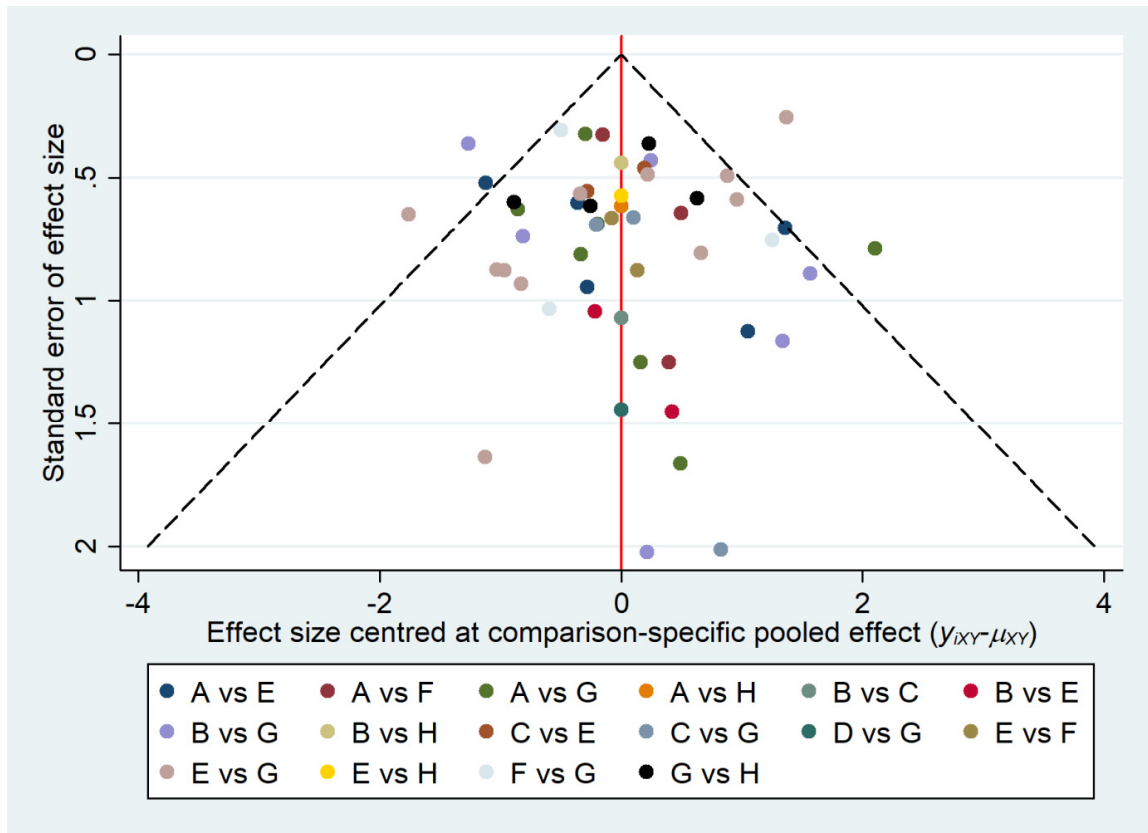

**Figure S2.** Comparison-adjusted funnel plot for the network meta-analysis of (A) the success at first intubation attempts, (B) intubation time, (C) glottic view and (D) sore throat in all circumstances of airway. A, Airtraq video laryngoscope; B, Pentax Airwayscope; C, C-MAC video laryngoscope; D, C-MAC D-Blade video laryngoscope; E, GlideScope; F, King Vision video laryngoscope; G, Macintosh direct laryngoscope; H, McGrath video laryngoscope.

(A)

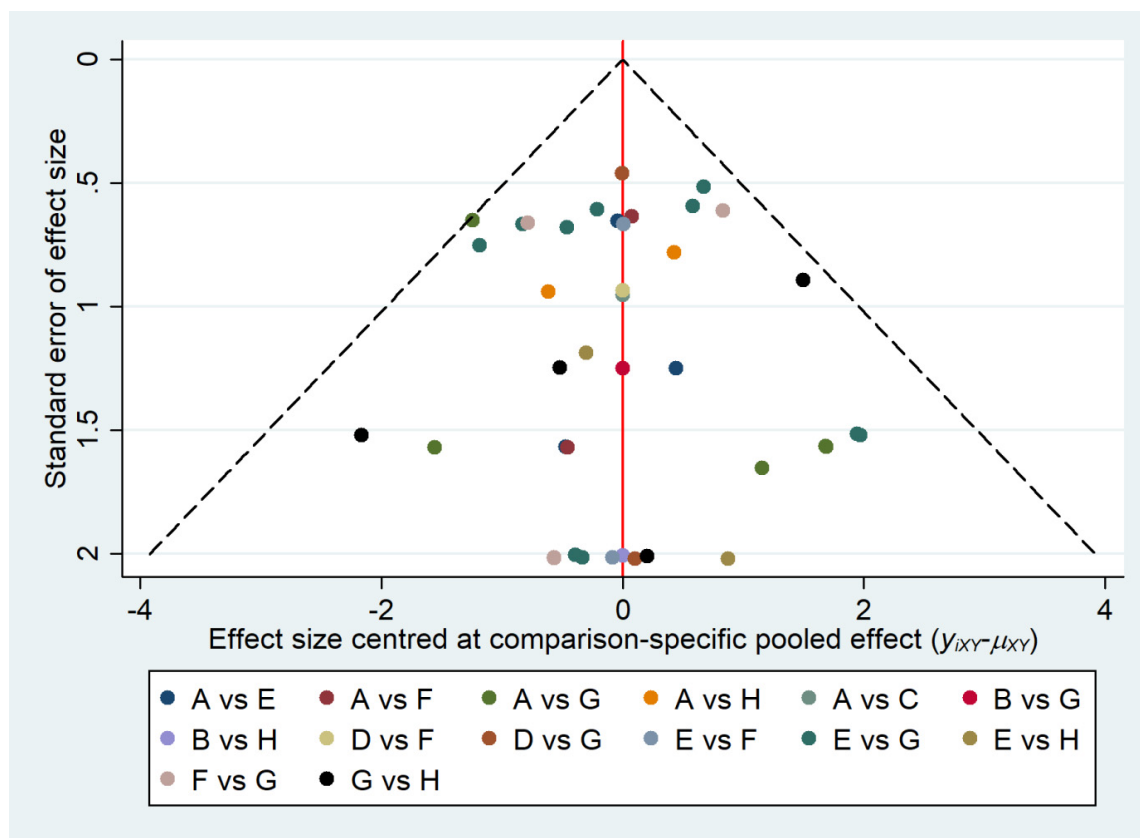

(B)

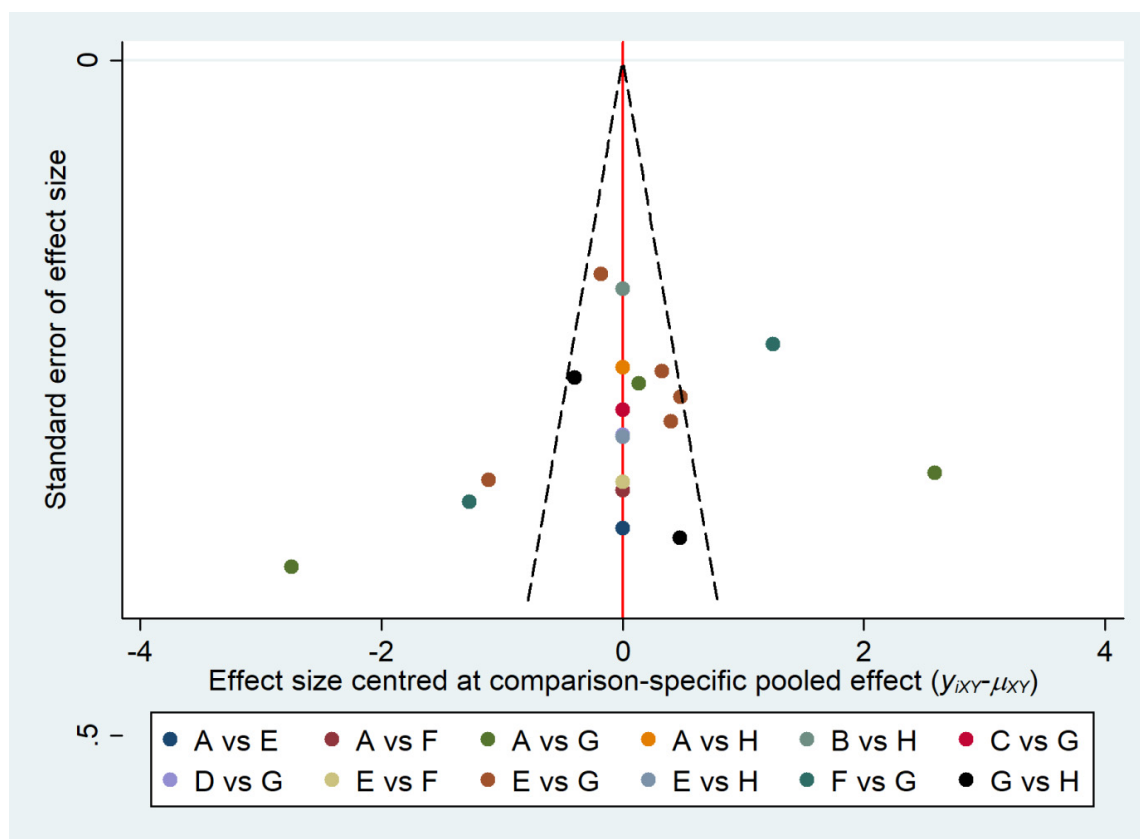

(C)

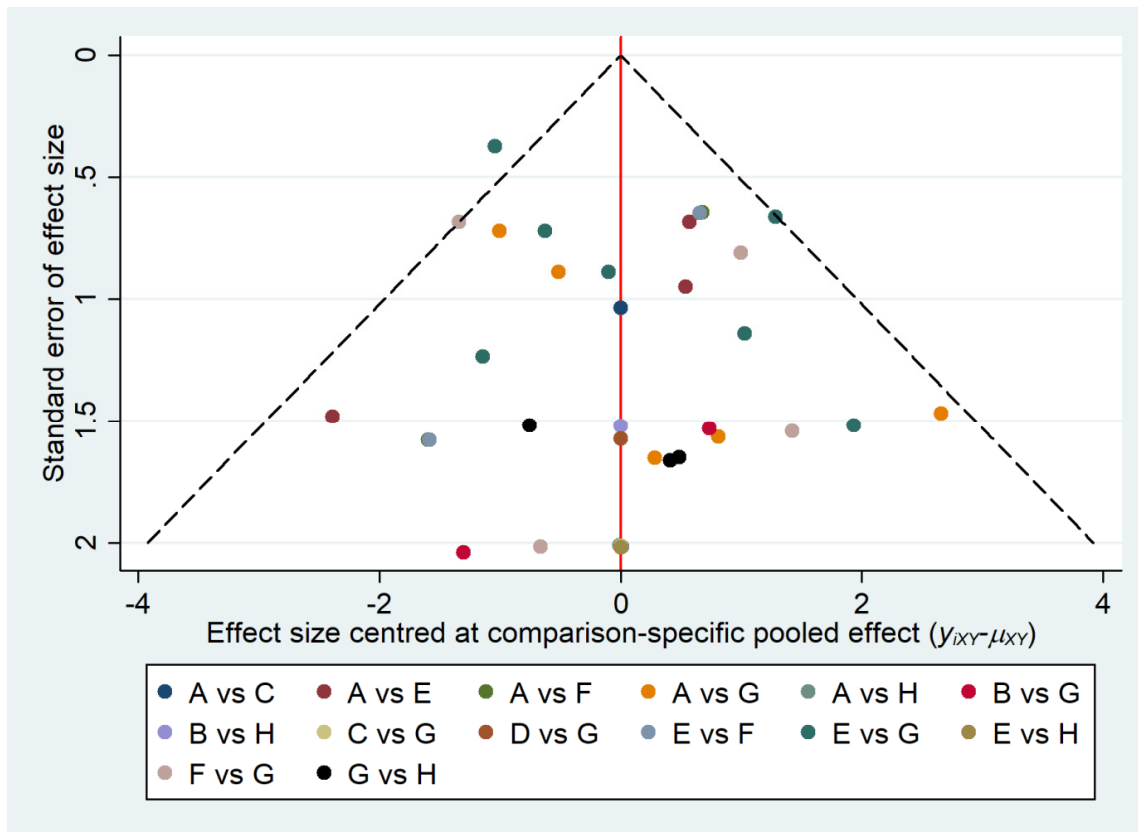

(D)

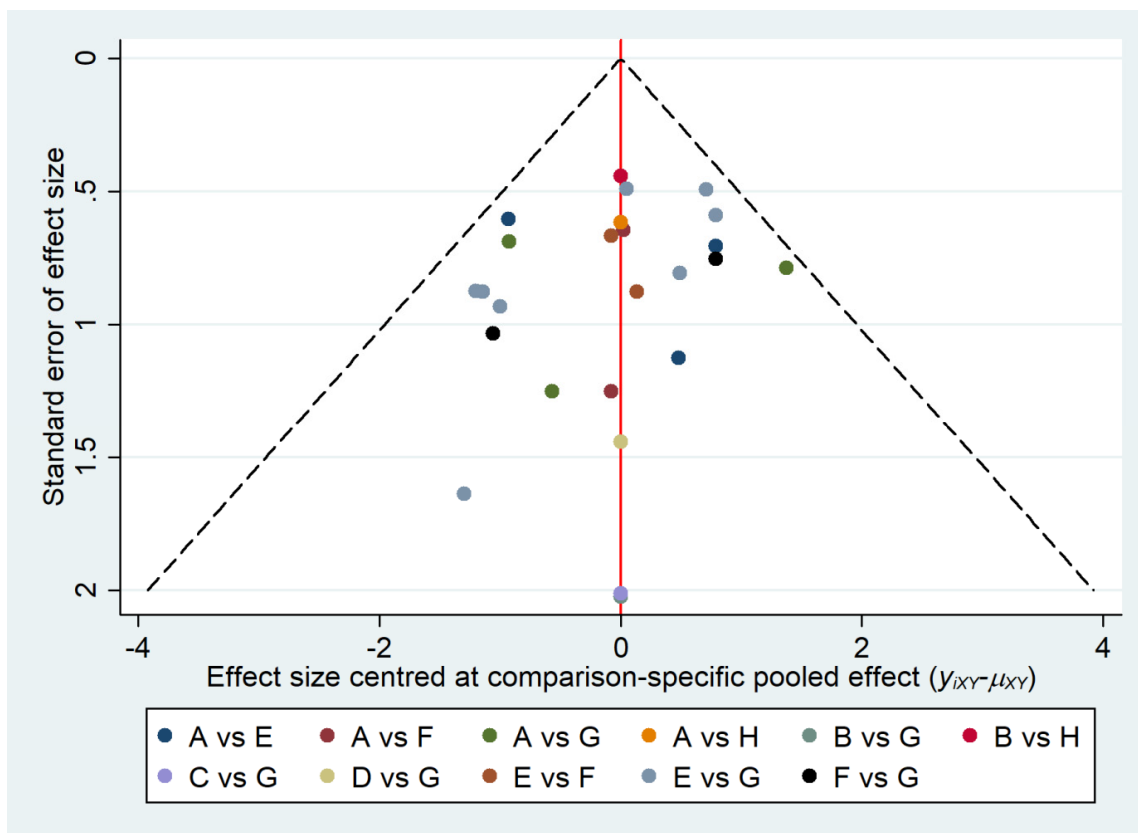

**Figure S3.** Comparison-adjusted funnel plot for the network meta-analysis of (A) the success at first intubation attempts, (B) intubation time, (C) glottic view and (D) sore throat in normal airway. A, Airtraq video laryngoscope; B, Pentax Airwayscope; C, C-MAC video laryngoscope; D, C-MAC D-Blade video laryngoscope; E, GlideScope; F, King Vision video laryngoscope; G, Macintosh direct laryngoscope; H, McGrath video laryngoscope.

(A)

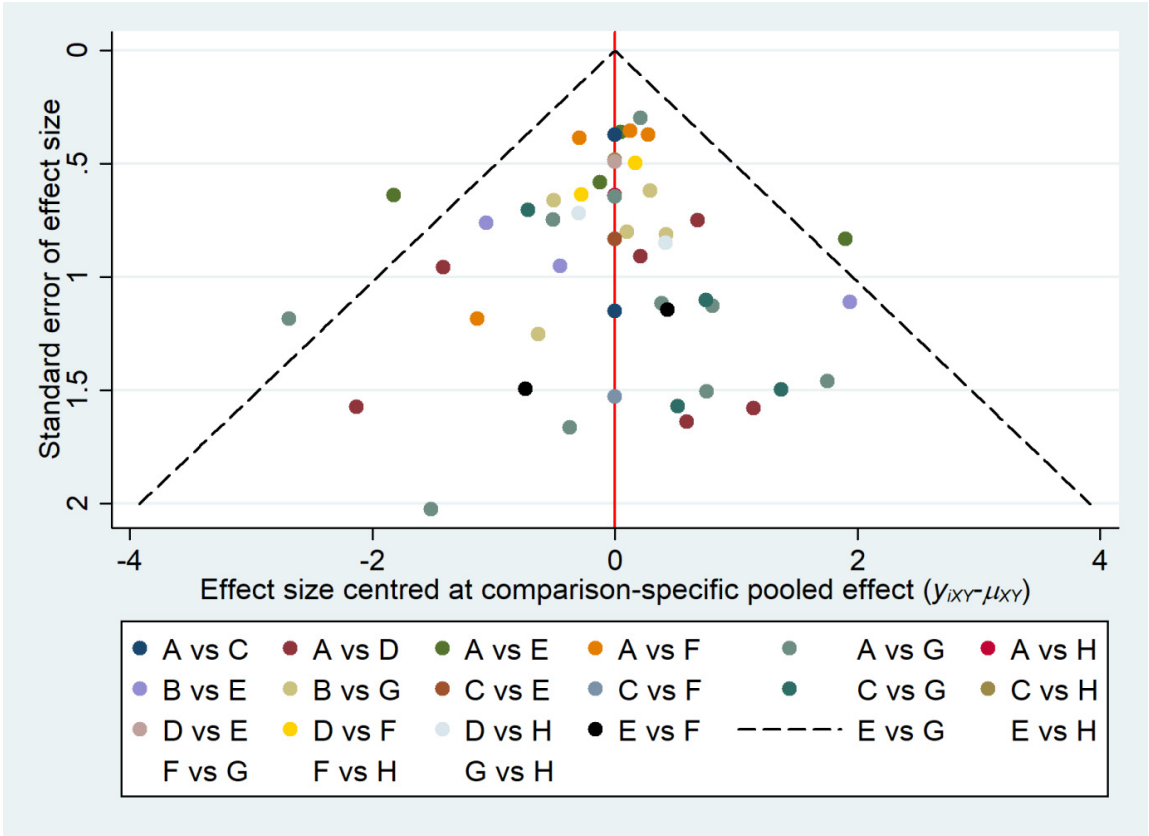

(B)

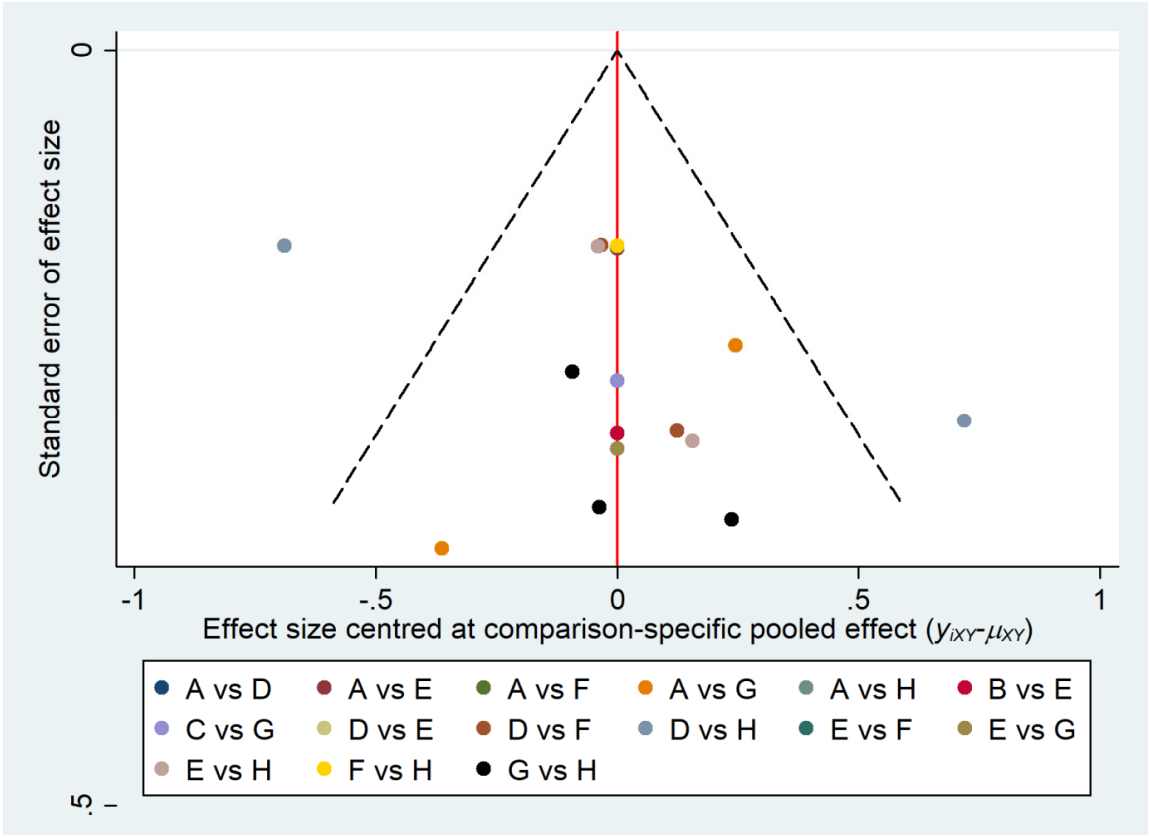

(C)

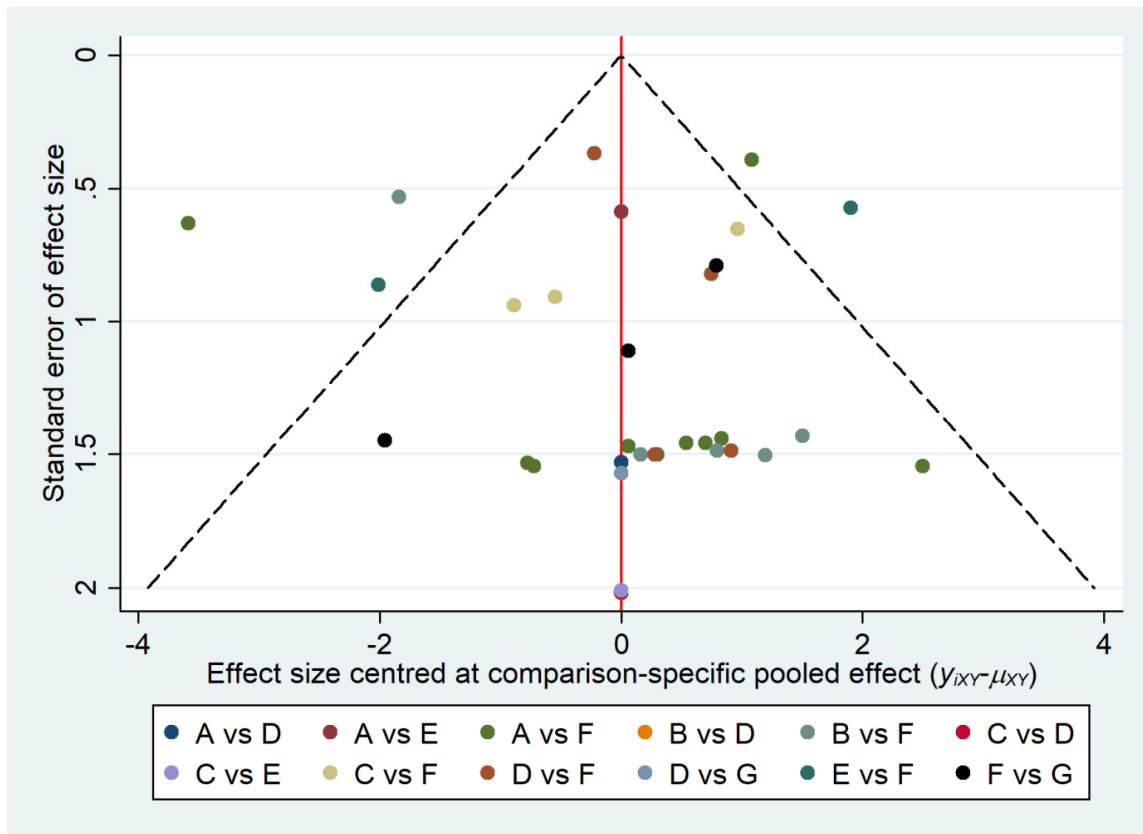

(D)

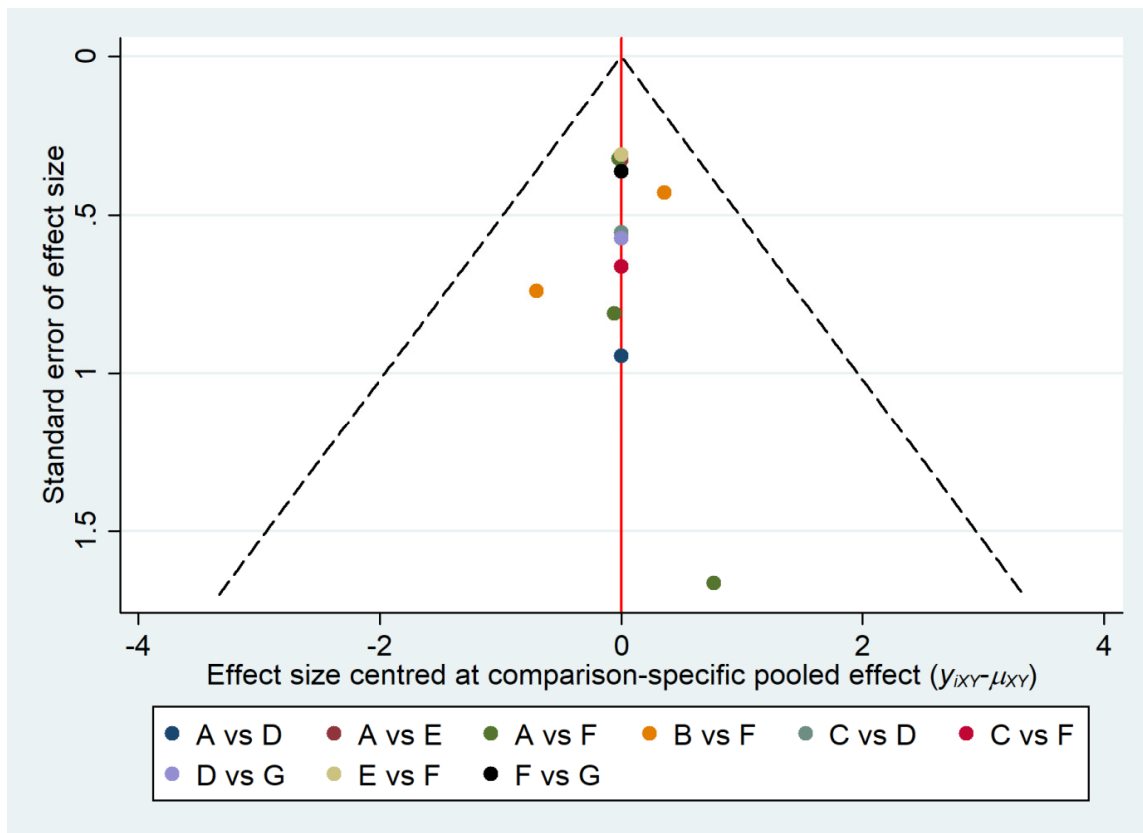

**Figure S4.** Comparison-adjusted funnel plot for the network meta-analysis of (A) the success at first intubation attempts, (B) intubation time, (C) glottic view and (D) sore throat in difficult airway. A, Airtraq video laryngoscope; B, Pentax Airwayscope; C, C-MAC video laryngoscope; D, C-MAC D-Blade video laryngoscope; E, GlideScope; F, King Vision video laryngoscope; G, Macintosh direct laryngoscope; H, McGrath video laryngoscope. In (C) and (D), D, GlideScope; E, King Vision video laryngoscope; F, Macintosh direct laryngoscope; G, McGrath video laryngoscope.
