# Supplementary material for: Comparisons of Videolaryngoscopes for Intubation Undergoing General Anesthesia: Systematic Review and Network Meta-Analysis of Randomized Controlled Trials
Source: MDPI journal article supplement (doi:10.3390/jpm12030363), 2022-02-26
Supplement: s1 [file s1]

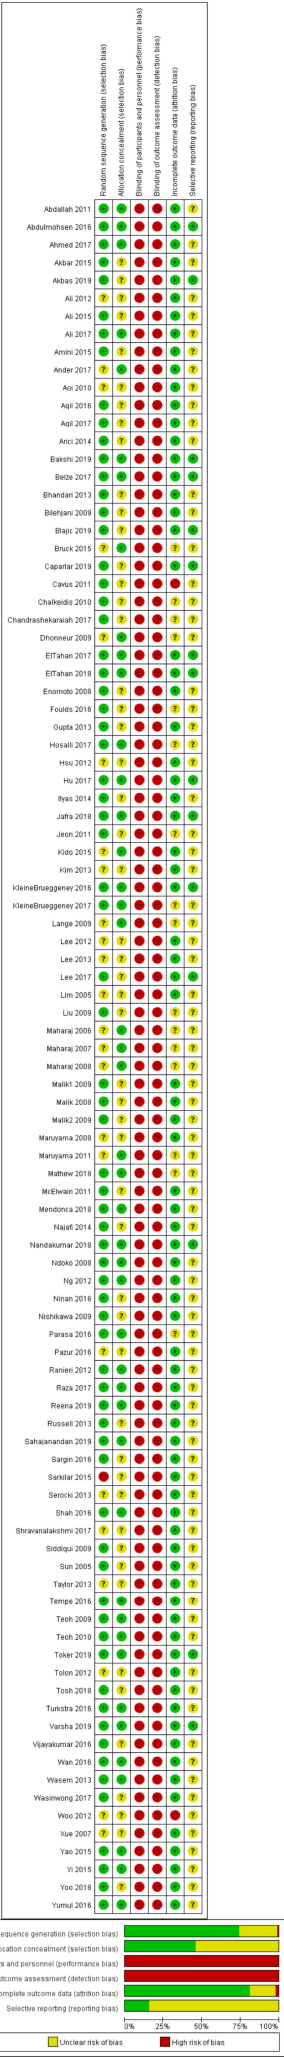

Figure S1. Risk of bias assessment. Author's judgments about each risk of bias item for each included study.
